# Supplementary material for: Pharmacomodulation of the Antimalarial Plasmodione: Synthesis of Biaryl- and N-Arylalkylamine Analogues, Antimalarial Activities and Physicochemical Properties
Source: MDPI journal article supplement (doi:10.3390/molecules22010161), 2017-01-19
Supplement: s1 [file s1]

# Supplementary materials: Pharmacomodulation of the Antimalarial Plasmodione: Synthesis of Biaryl- and *N*-Arylalkylamine Analogues, Antimalarial Activities and Physicochemical Properties

Karène Urgin, Mouhamad Jida, Katharina Ehrhardt, Tobias Müller, Michael Lanzer, Louis Maes, Mourad Elhabiri, and Elisabeth Davioud-Charvet

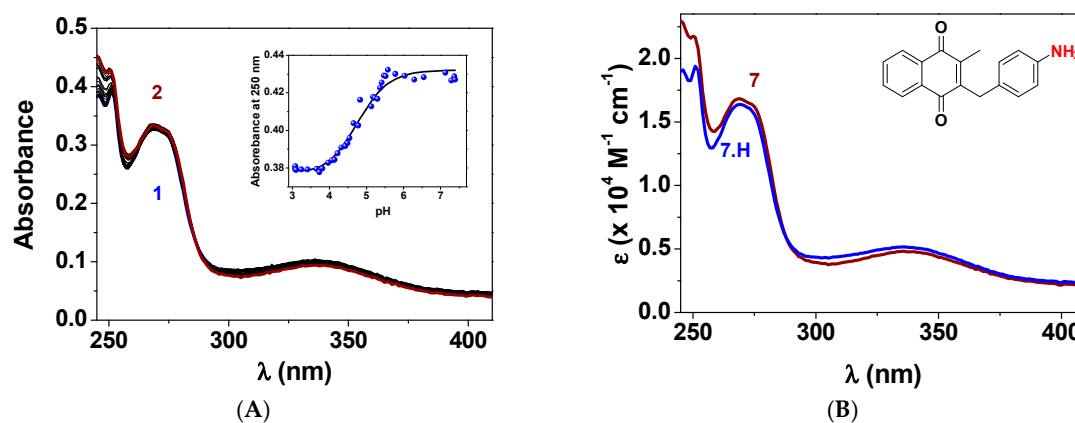

**Figure S1.** (A) Absorption spectrophotometric titration of compound 7 as a function of pH and (B) electronic spectra of 7 and its protonated species 7.H. Solvent: Water;  $I = 0.1$  M NaClO<sub>4</sub>;  $T = 25.0 \pm 0.2$  °C;  $l = 1$  cm;  $[7]_{\text{tot}} = 2.00 \times 10^{-5}$  M; (1) pH = 3.08; (2) pH = 7.39. The charges have been omitted for the sake of clarity. The inset of (A) shows the spectral variation at 250 nm as a function of pH. The UV-visible absorption spectra have not been corrected from dilution effects.

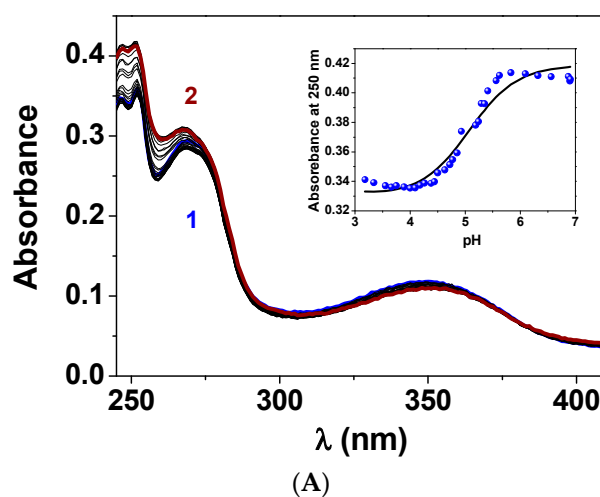

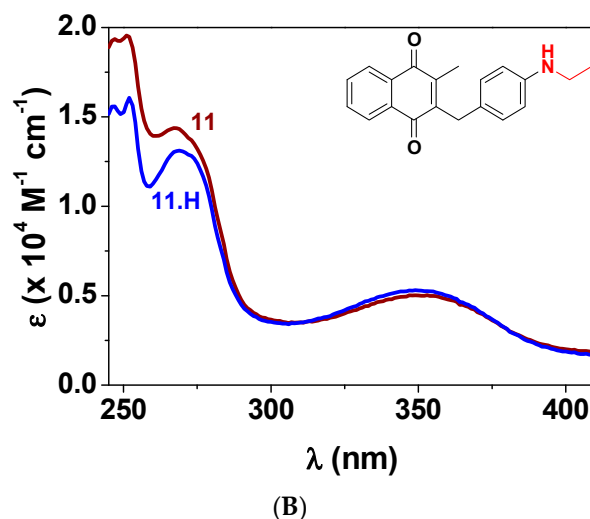

**Figure S2.** (A) Absorption spectrophotometric titration of compound 11 as a function of pH and (B) electronic spectra of 11 and its protonated species 11.H. Solvent: Water/DMSO (91/9 v/v);  $I = 0.1$  M NaClO<sub>4</sub>;  $T = 25.0 \pm 0.2$  °C;  $l = 1$  cm;  $[11]_{\text{tot}} = 2.18 \times 10^{-5}$  M; (1) pH = 3.18; (2) pH = 6.91. The charges have been omitted for the sake of clarity. The inset of (A) shows the spectral variation at 250 nm as a function of pH. The UV-visible absorption spectra have not been corrected from dilution effects.

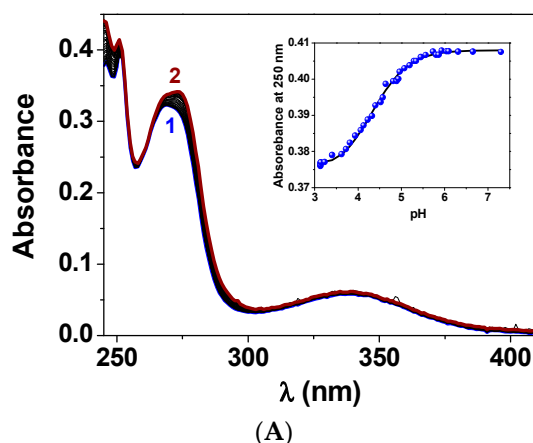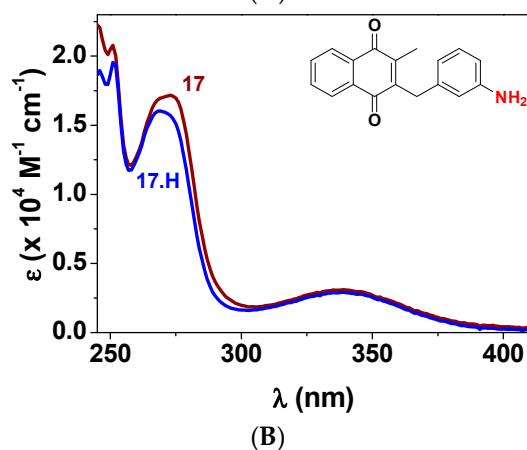

**Figure S3.** (A) Absorption spectrophotometric titration of compound 17 as a function of pH and (B) electronic spectra of 17 and its protonated species 17.H. Solvent: Water;  $I = 0.1$  M NaClO<sub>4</sub>;  $T = 25.0 \pm 0.2$  °C;  $l = 1$  cm;  $[17]_{\text{tot}} = 2.00 \times 10^{-5}$  M; (1) pH = 3.13; (2) pH = 7.30. The charges have been omitted for the sake of clarity. The inset of (A) shows the spectral variation at 250 nm as a function of pH. The UV-visible absorption spectra have not been corrected from dilution effects.

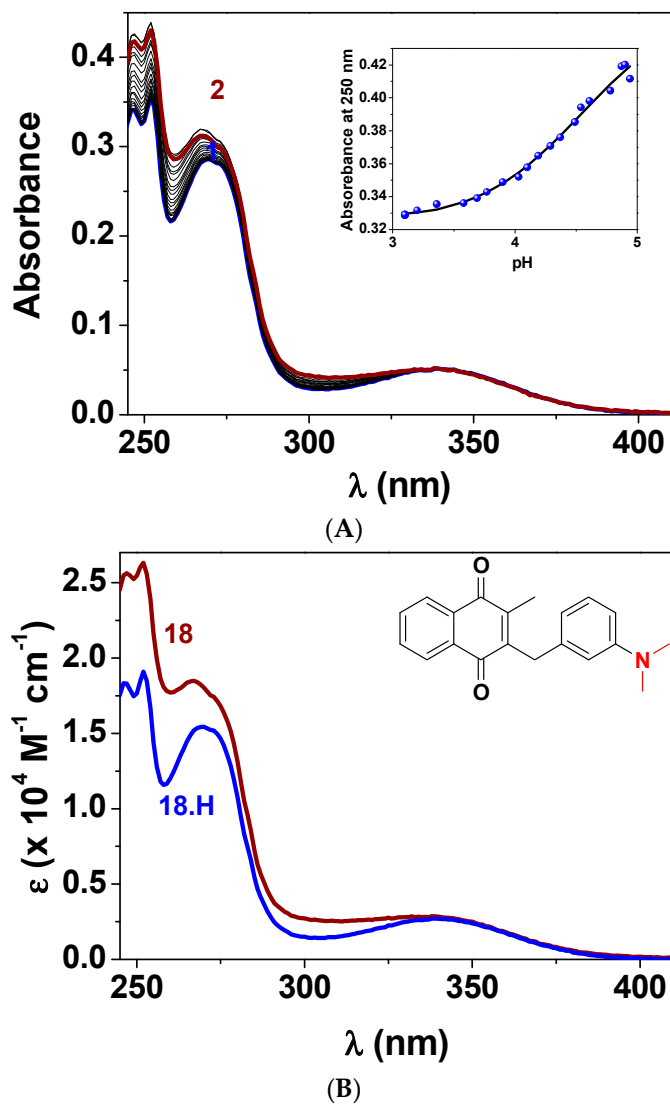

**Figure S4.** (A) Absorption spectrophotometric titration of compound 18 as a function of pH and (B) electronic spectra of 18 and its protonated species 18.H. Solvent: Water;  $I = 0.1 \text{ M NaClO}_4$ ;  $T = 25.0 \pm 0.2 \text{ }^\circ\text{C}$ ;  $l = 1 \text{ cm}$ ;  $[\text{18}]_{\text{tot}} = 1.84 \times 10^{-5} \text{ M}$ ; (1) pH = 3.10; (2) pH = 4.94. The charges have been omitted for the sake of clarity. The inset of (A) shows the spectral variation at 250 nm as a function of pH. The UV-visible absorption spectra have not been corrected from dilution effects.

2.  $^1\text{H-NMR}$  and  $^{13}\text{C-NMR}$  spectra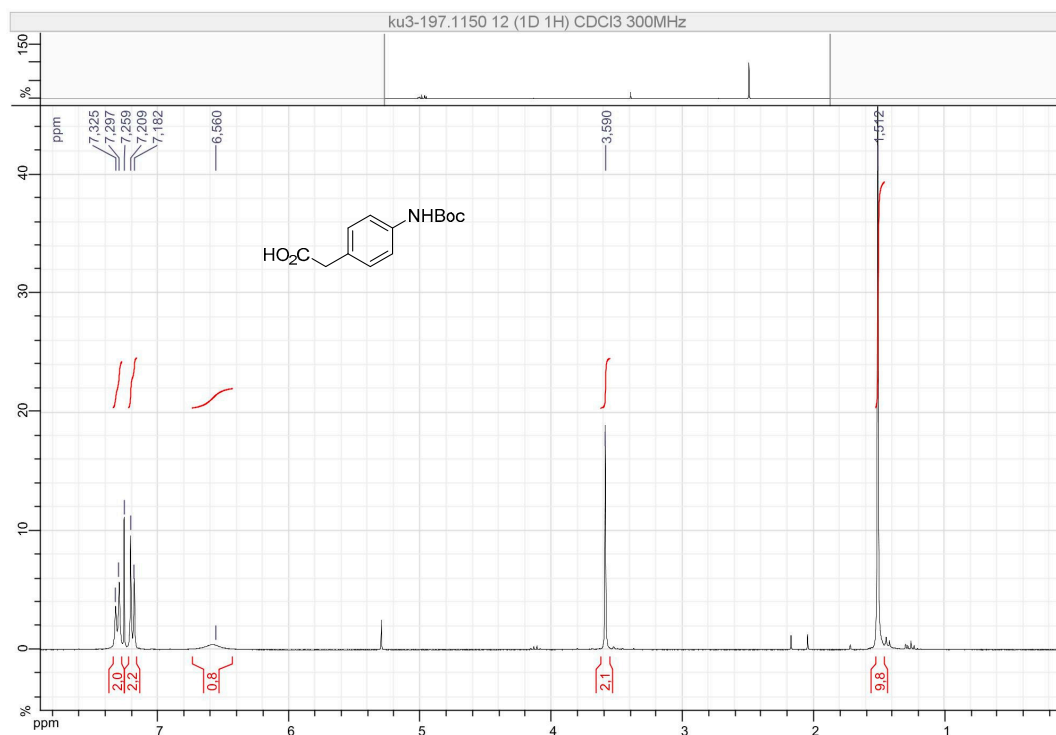Figure S5.  $^1\text{H-NMR}$  (300 MHz,  $\text{CDCl}_3$ ) spectrum of compound 5.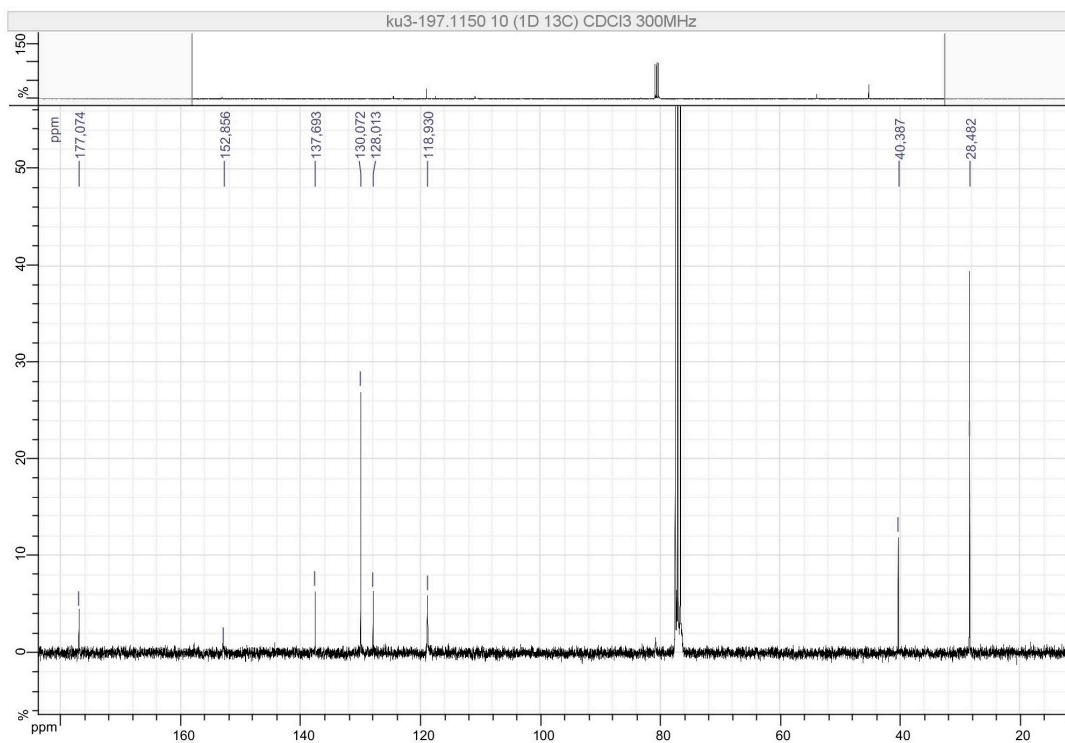Figure S6.  $^{13}\text{C-NMR}$  (75 MHz,  $\text{CDCl}_3$ ) spectrum of compound 5.

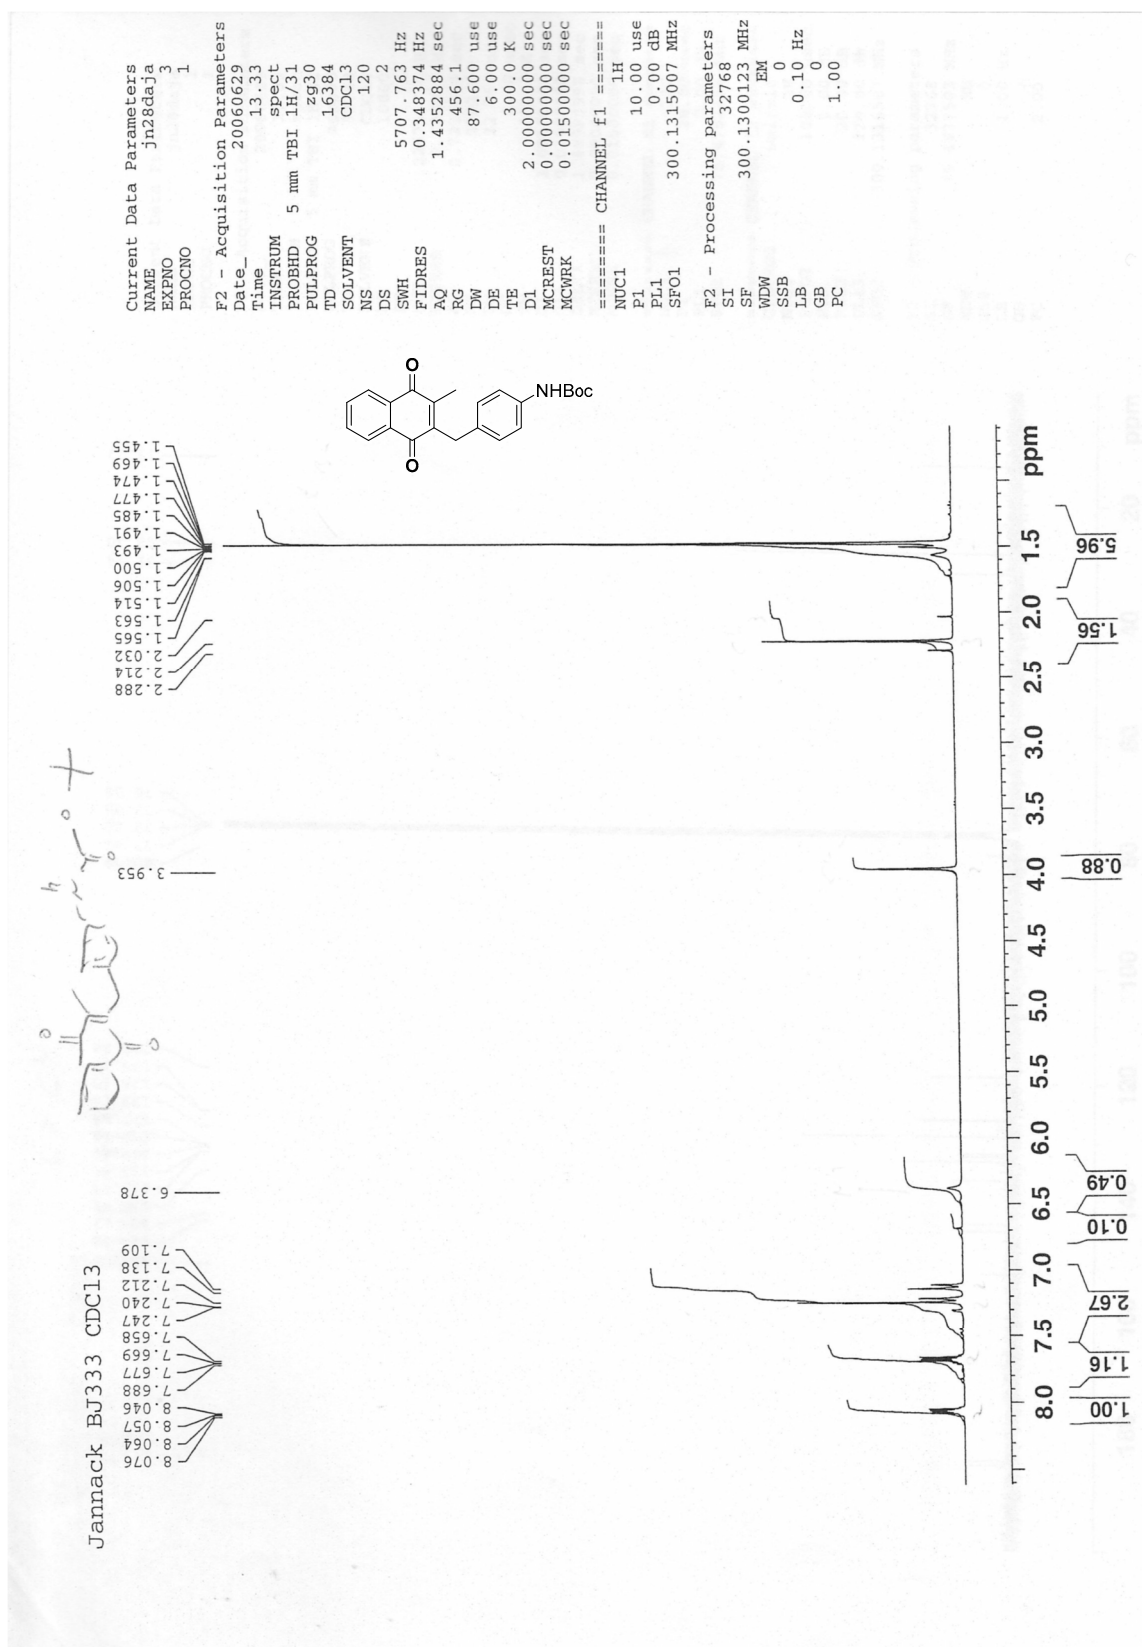

Figure S7. <sup>1</sup>H NMR (300 MHz, CDCl<sub>3</sub>) spectrum of compound 6.

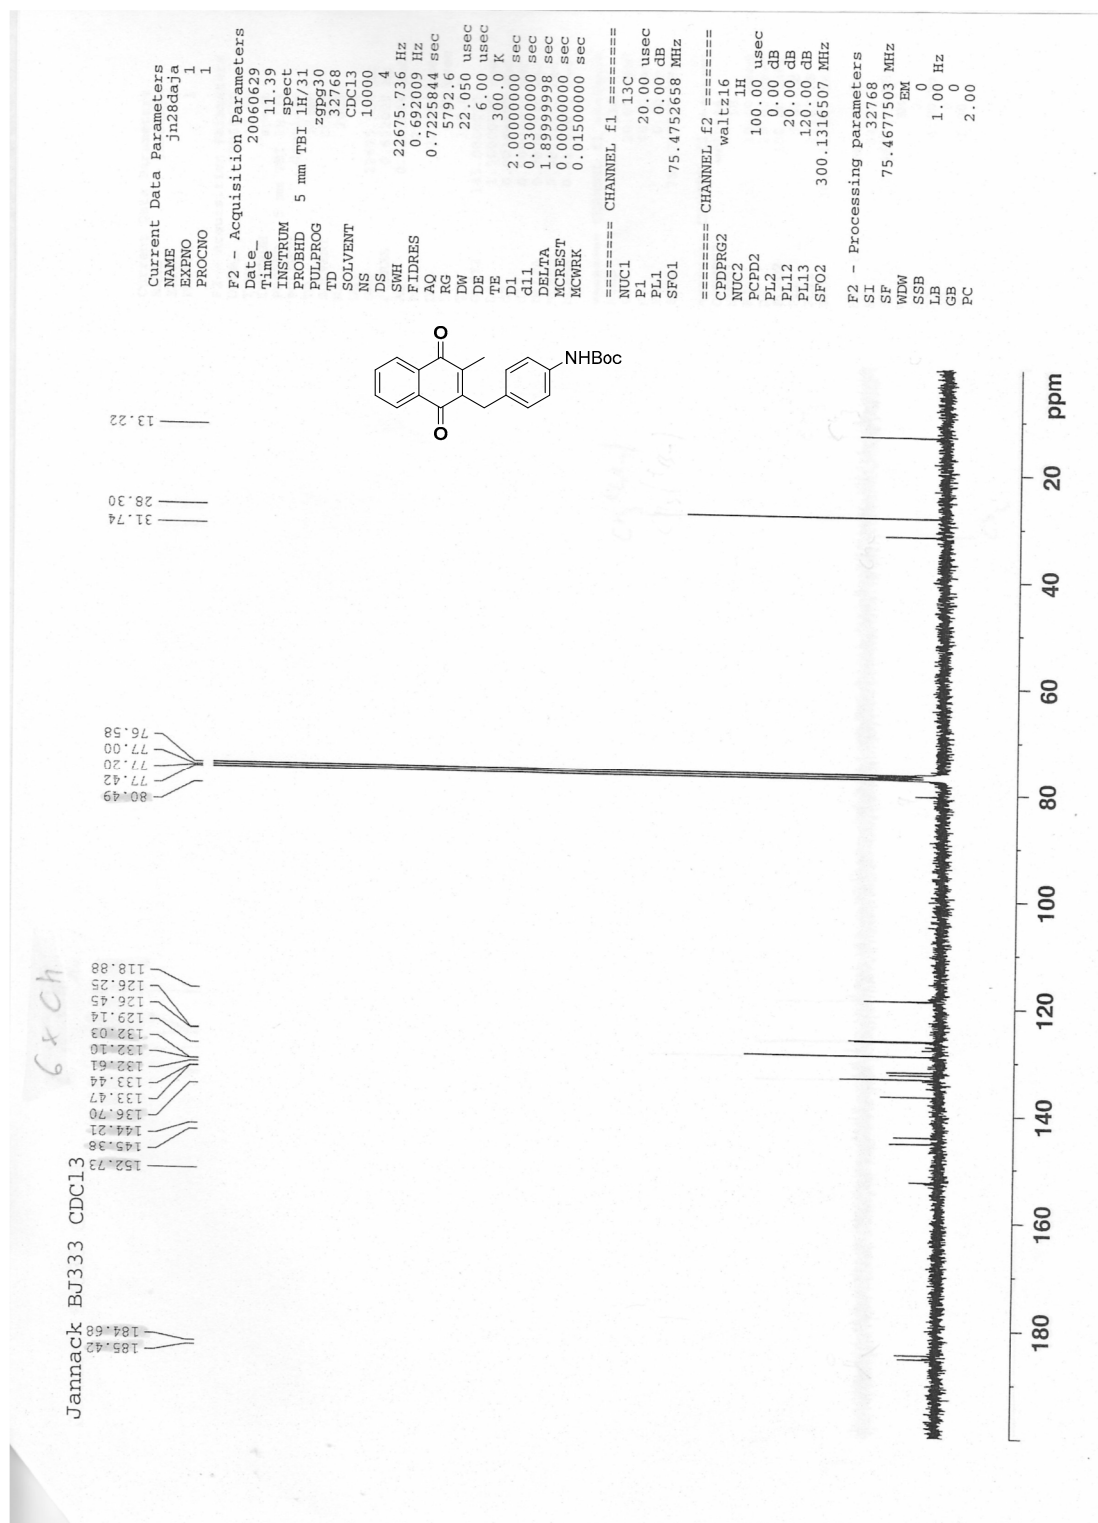

Figure S8.  $^{13}\text{C}$ -NMR (75 MHz,  $\text{CDCl}_3$ ) spectrum of compound 6.

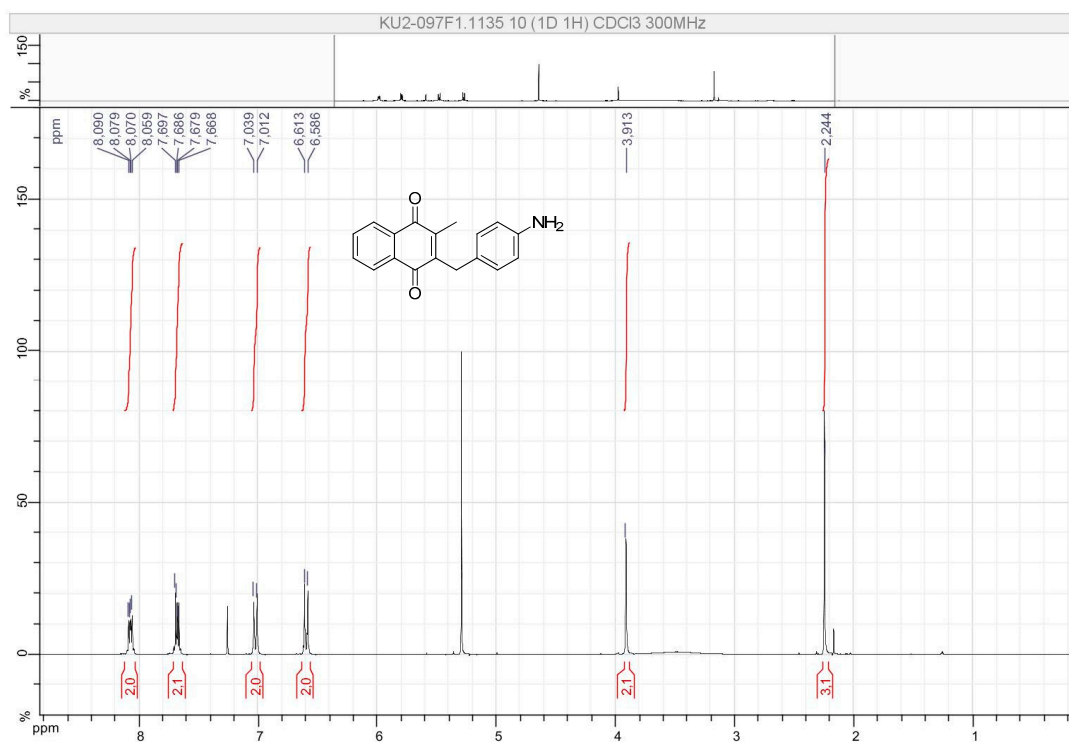

Figure S9. <sup>1</sup>H-NMR (300 MHz, CDCl<sub>3</sub>) spectrum of compound 7.

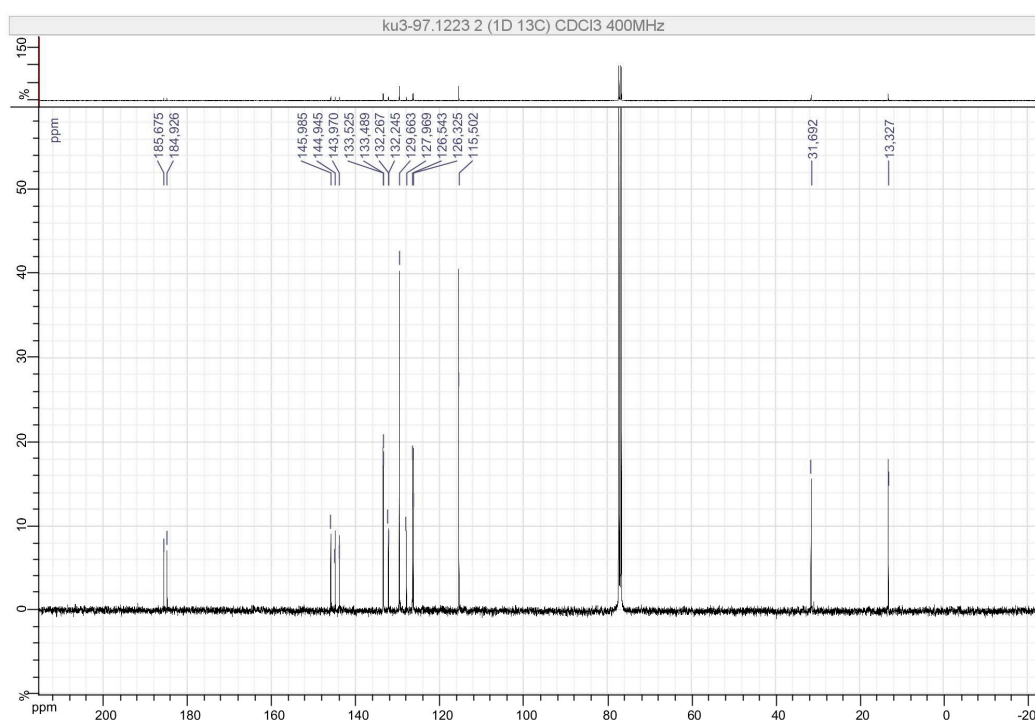

Figure S10. <sup>13</sup>C-NMR (100 MHz, CDCl<sub>3</sub>) spectrum of compound 7.

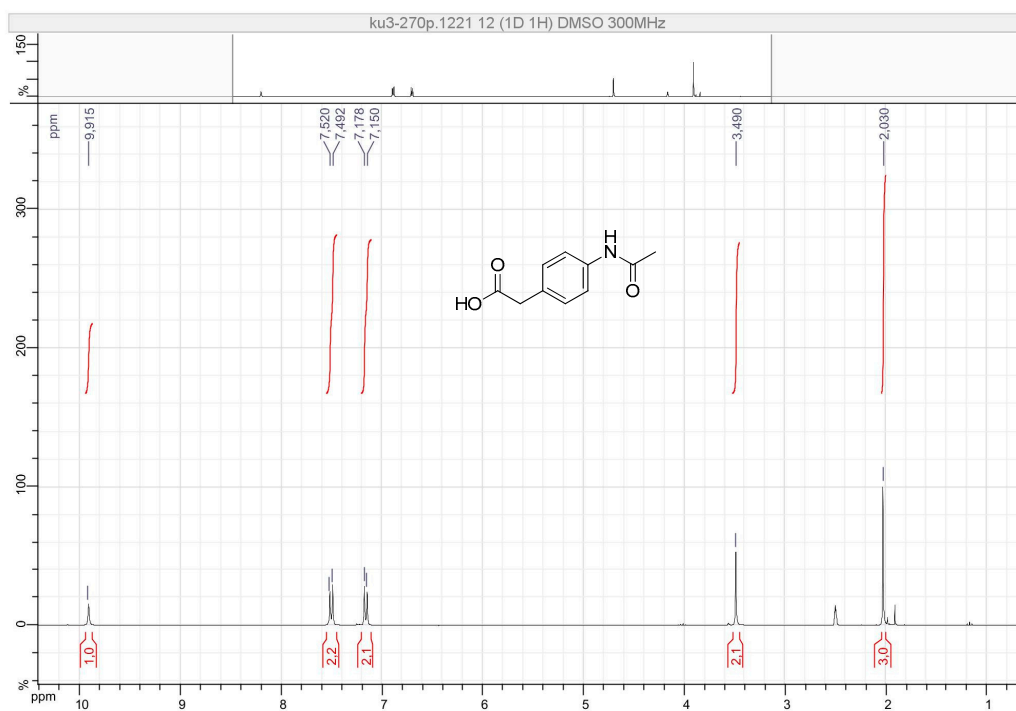

Figure S11.  $^1\text{H-NMR}$  (300 MHz,  $\text{DMSO-d}_6$ ) spectrum of compound 8.

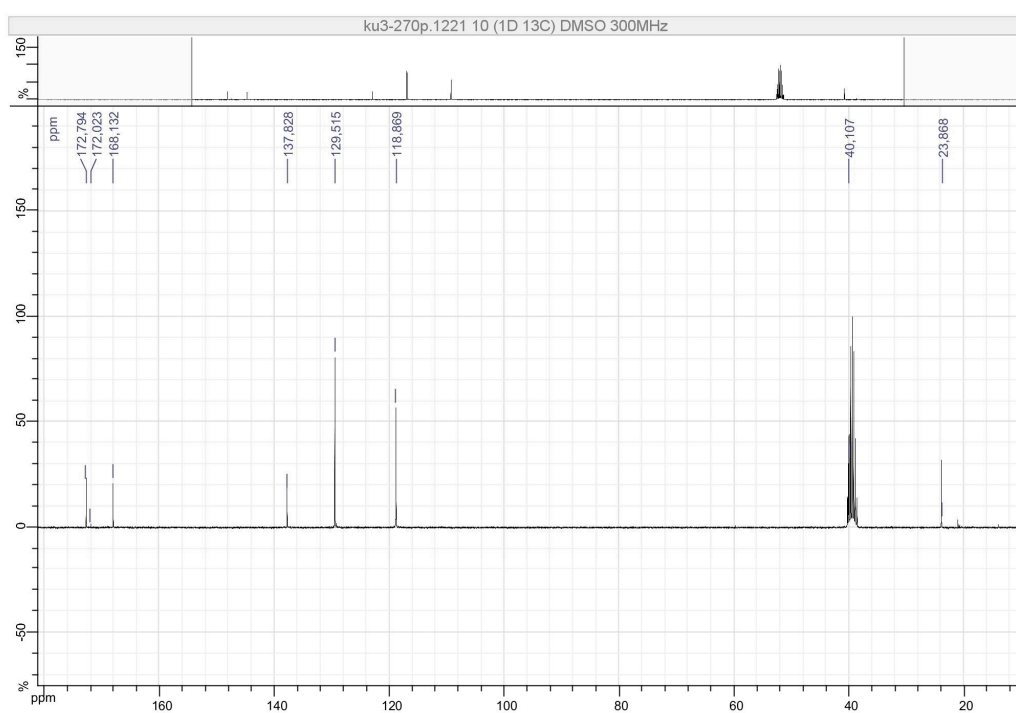

Figure S12.  $^{13}\text{C-NMR}$  (75 MHz,  $\text{DMSO-d}_6$ ) spectrum of compound 8.



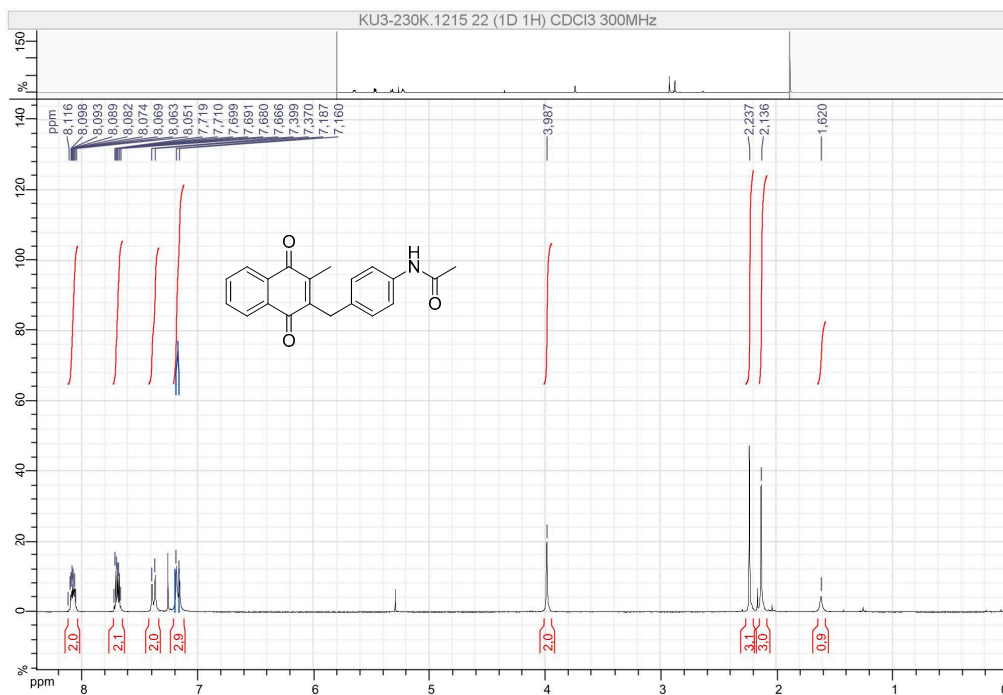

Figure S13.  $^1\text{H-NMR}$  (300 MHz,  $\text{CDCl}_3$ ) spectrum of compound 9.

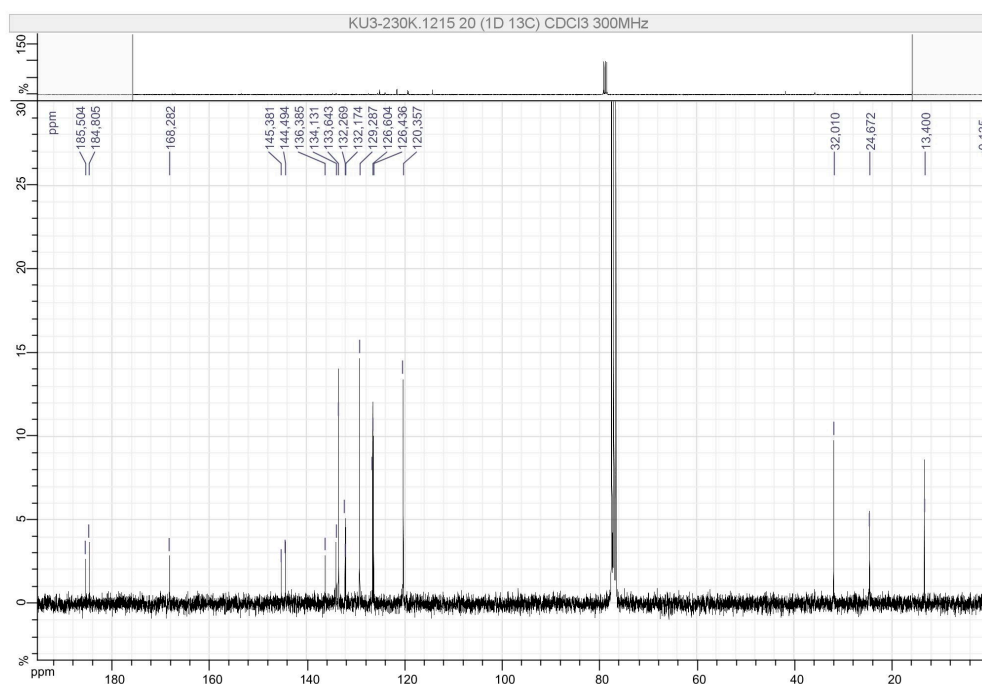

Figure S14.  $^{13}\text{C-NMR}$  (75 MHz,  $\text{CDCl}_3$ ) spectrum of compound 9.

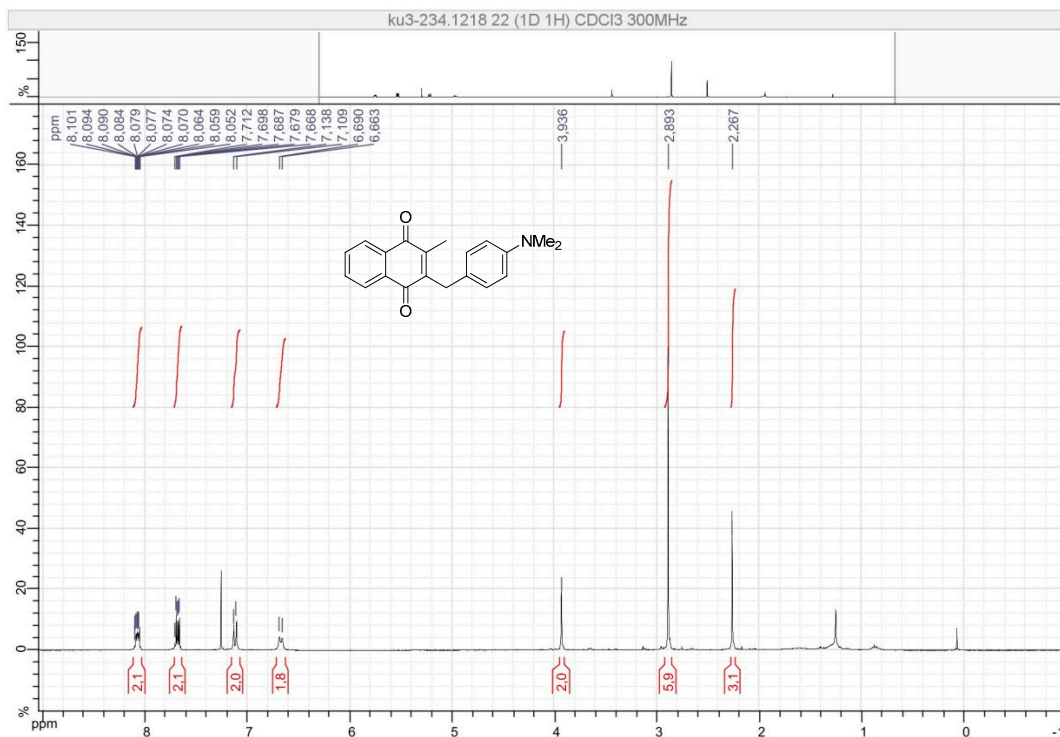

Figure S15. <sup>1</sup>H-NMR (300 MHz, CDCl<sub>3</sub>) spectrum of compound 3.

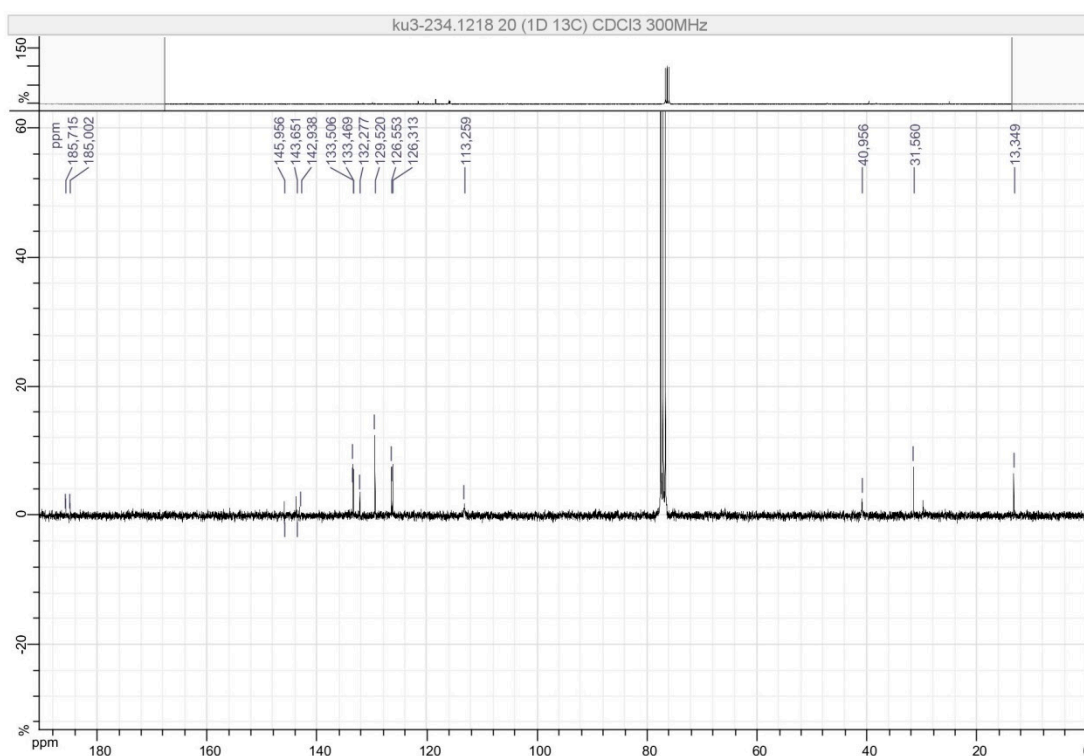

Figure S16. <sup>13</sup>C-NMR (75 MHz, CDCl<sub>3</sub>) spectrum of compound 3.

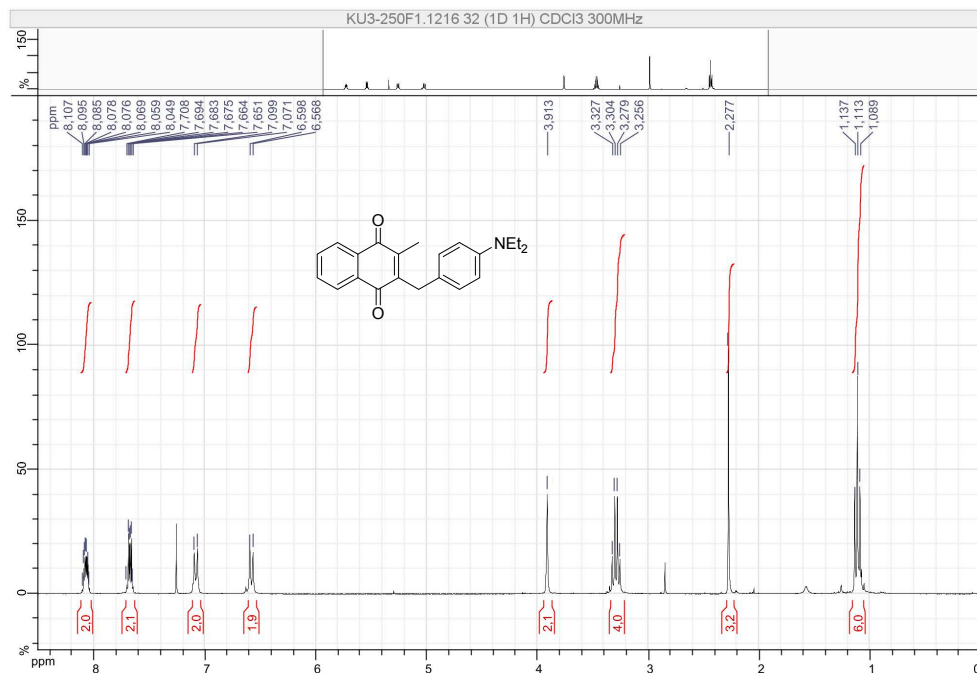

**Figure S17.** <sup>1</sup>H-NMR (300 MHz, CDCl<sub>3</sub>) spectrum of compound 11.

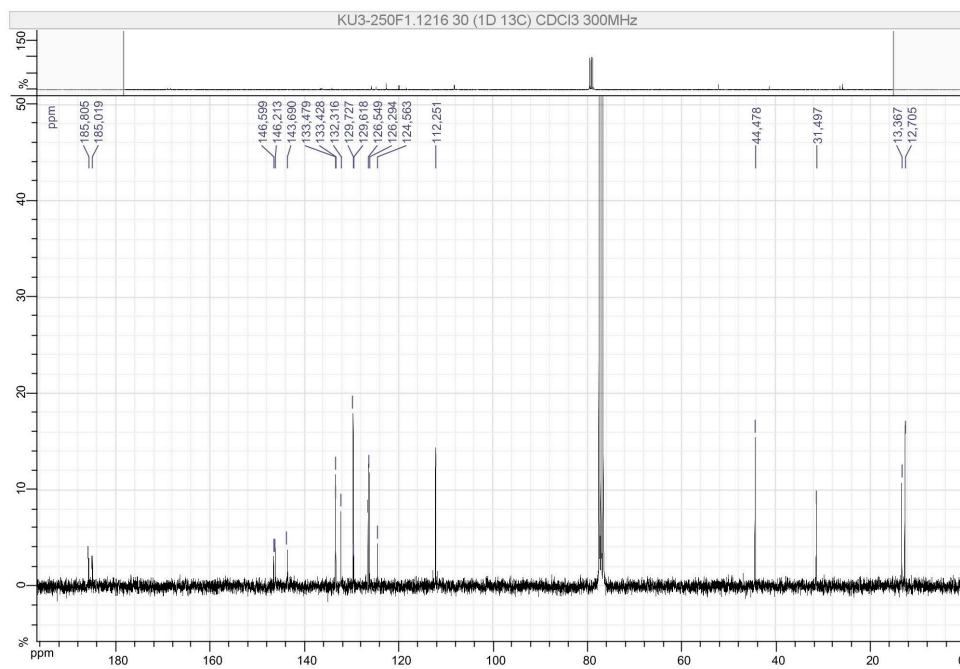

**Figure S18.** <sup>13</sup>C-NMR (75 MHz, CDCl<sub>3</sub>) spectrum of compound 11.

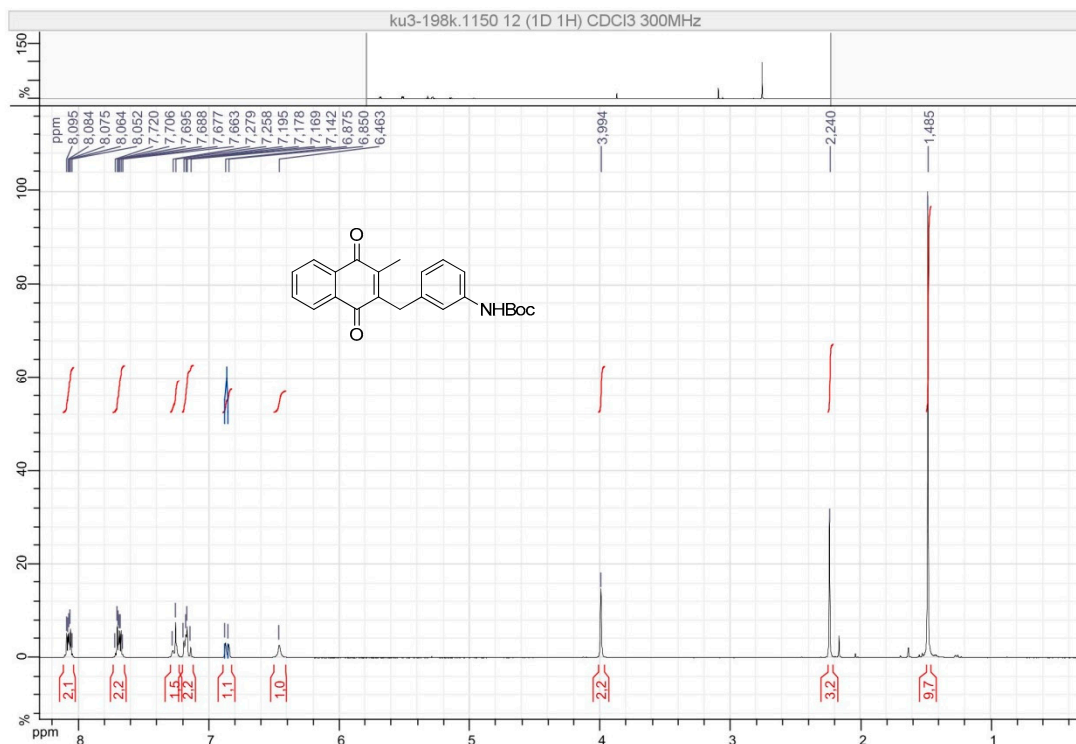

Figure S19. <sup>1</sup>H-NMR (300 MHz, CDCl<sub>3</sub>) spectrum of compound 14.

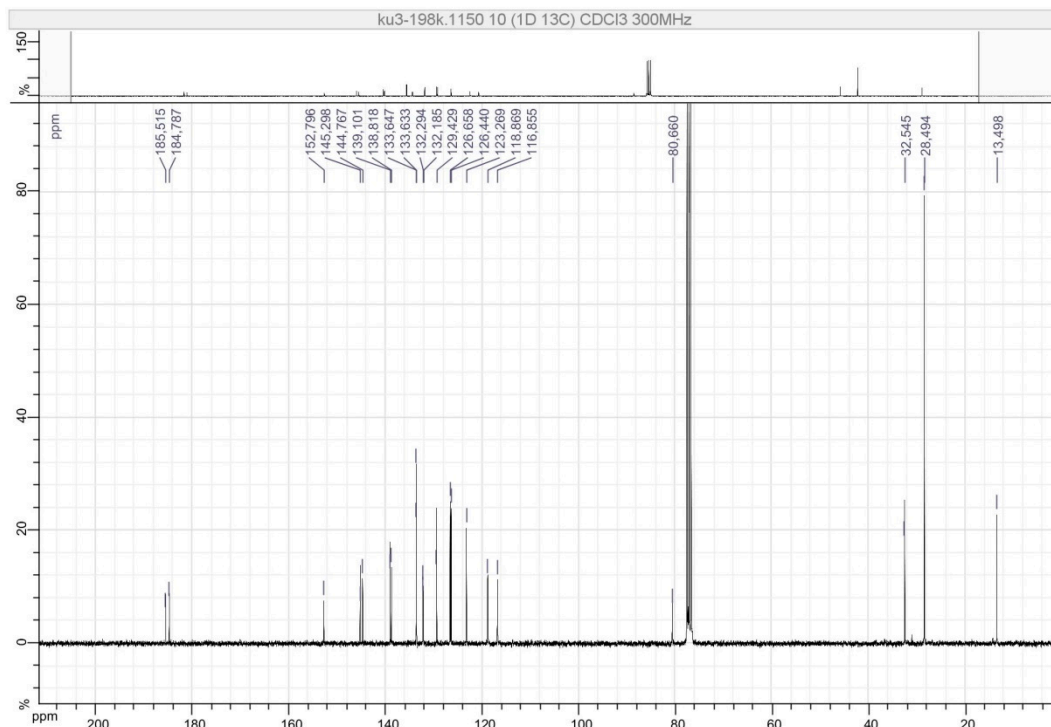

Figure S20. <sup>13</sup>C-NMR (75 MHz, CDCl<sub>3</sub>) spectrum of compound 14.

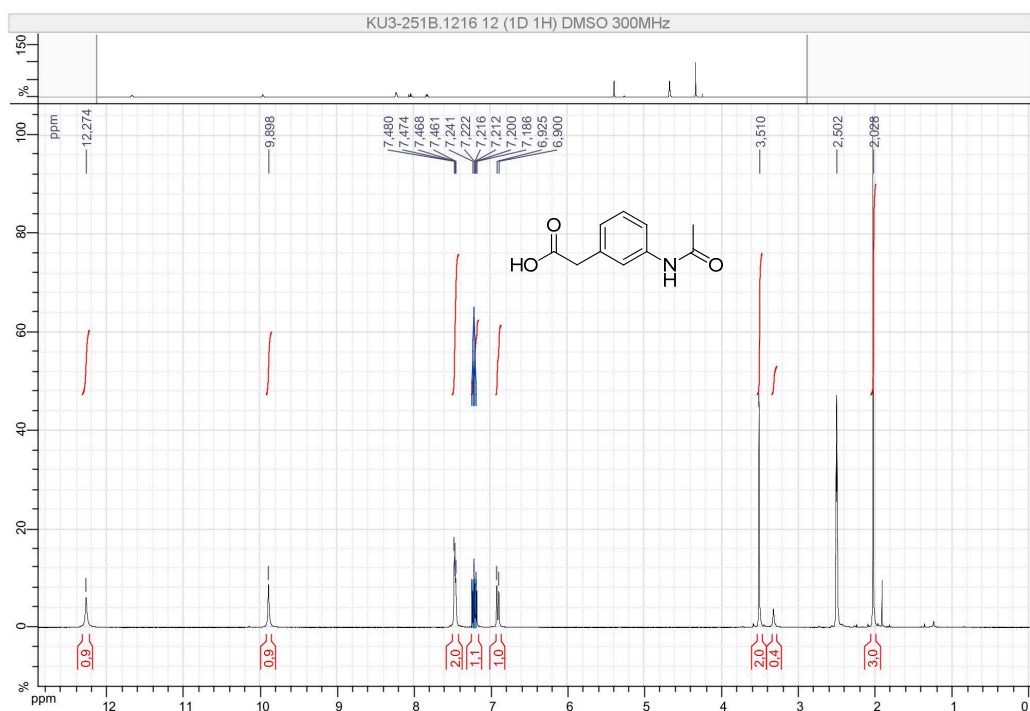

Figure S21.  $^1\text{H-NMR}$  (300 MHz,  $\text{DMSO-d}_6$ ) spectrum of compound 15.

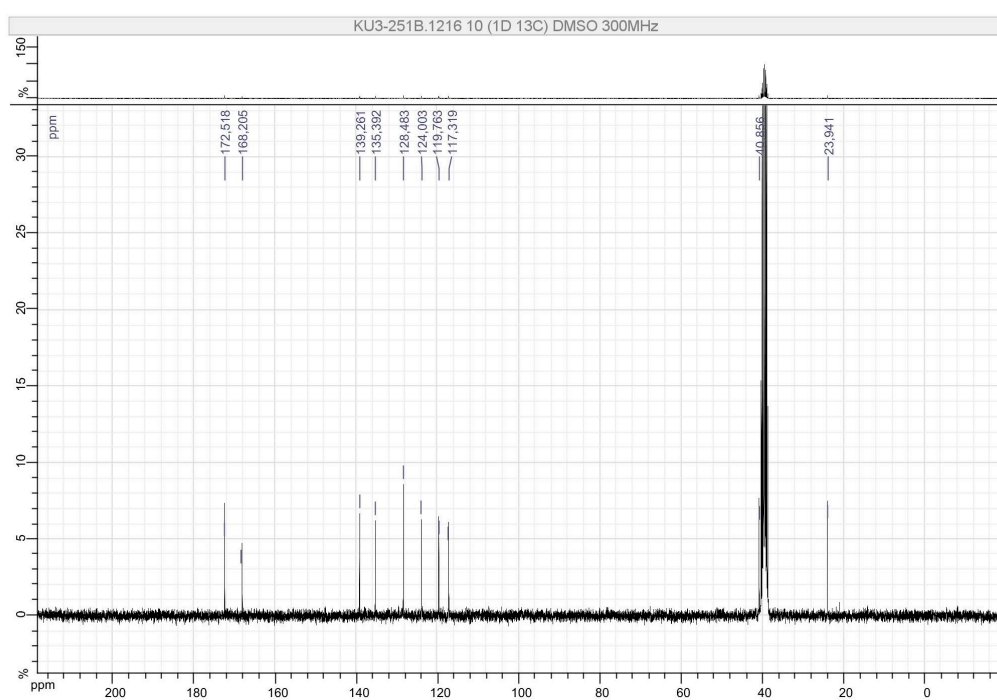

Figure S22.  $^{13}\text{C-NMR}$  (75 MHz,  $\text{DMSO-d}_6$ ) spectrum of compound 15.

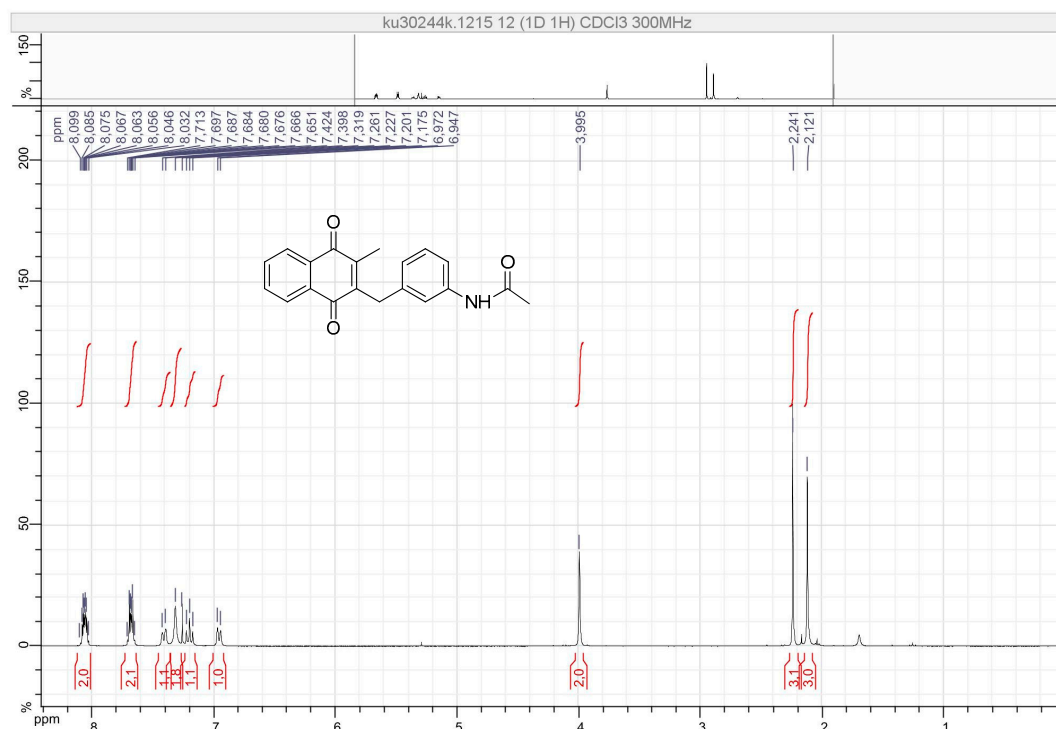

Figure S23.  $^1\text{H-NMR}$  (300 MHz,  $\text{CDCl}_3$ ) spectrum of compound 16.

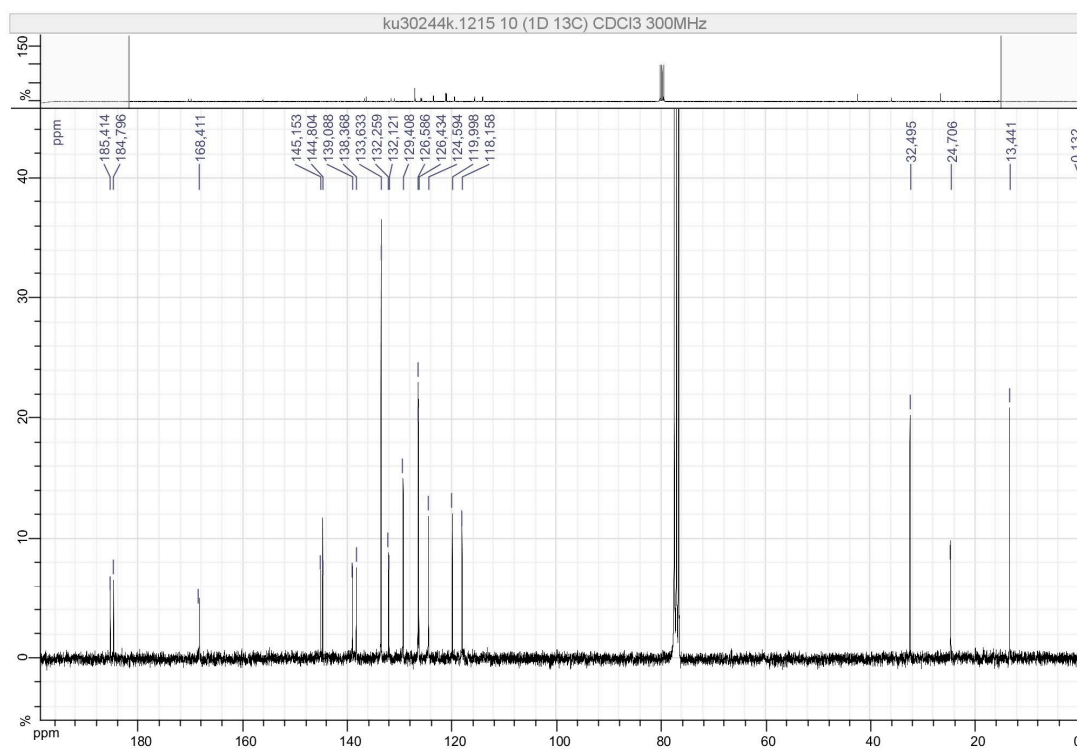

Figure S24.  $^{13}\text{C-NMR}$  (75 MHz,  $\text{CDCl}_3$ ) spectrum of compound 16.

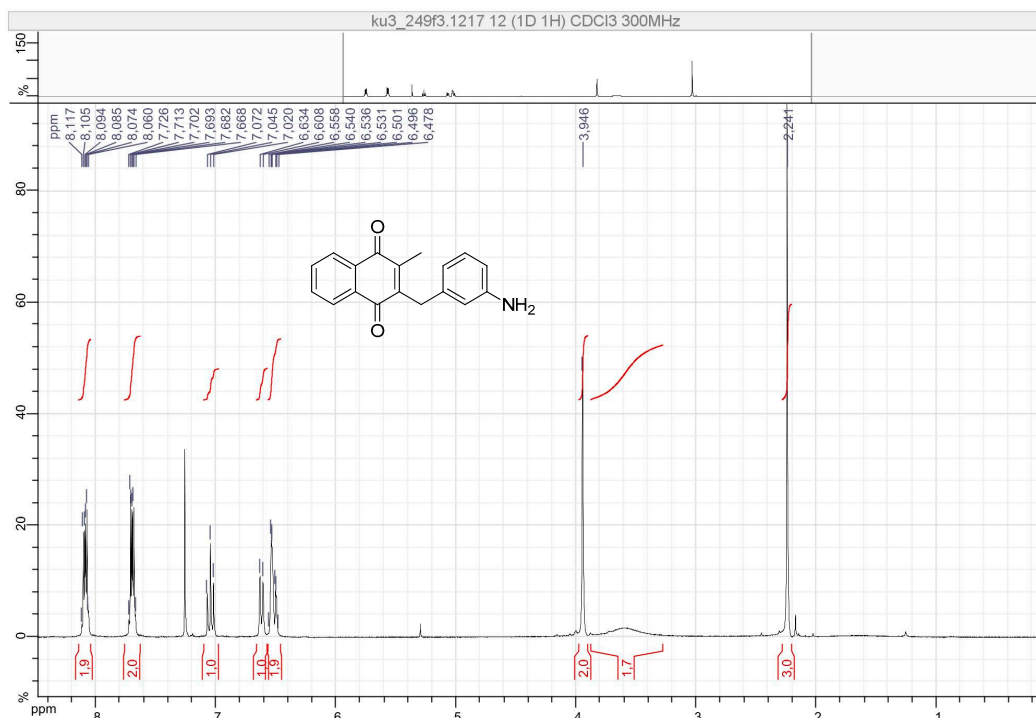

Figure S25. <sup>1</sup>H-NMR (300 MHz, CDCl<sub>3</sub>) spectrum of compound 17.

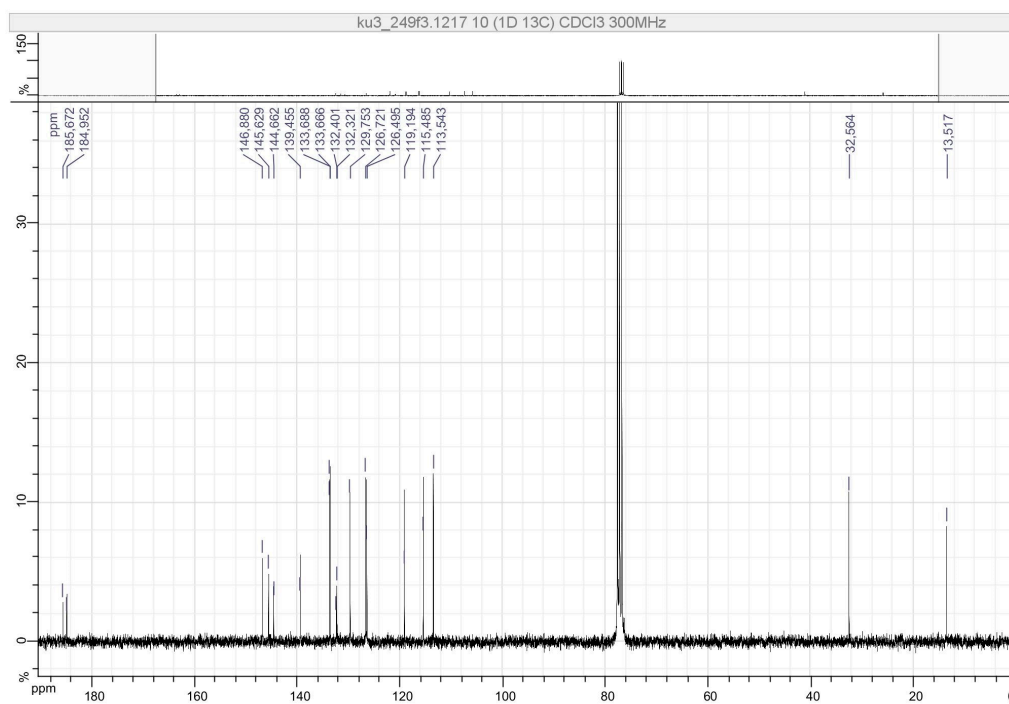

Figure S26. <sup>13</sup>C-NMR (75 MHz, CDCl<sub>3</sub>) spectrum of compound 17.

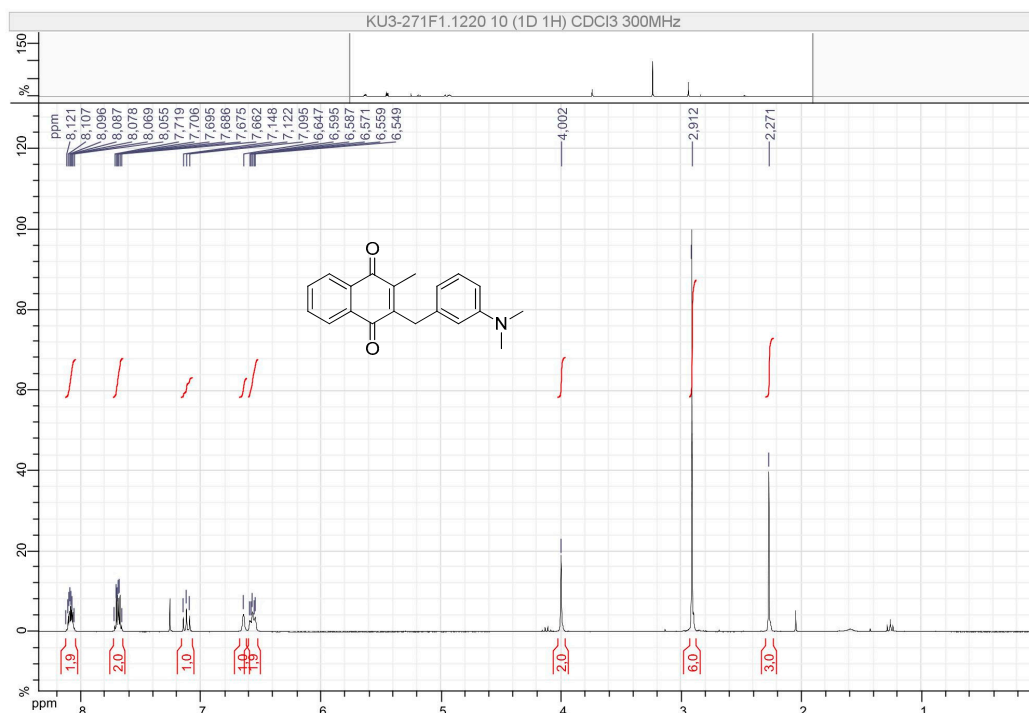

Figure S27. <sup>1</sup>H-NMR (300 MHz, CDCl<sub>3</sub>) spectrum of compound 18.

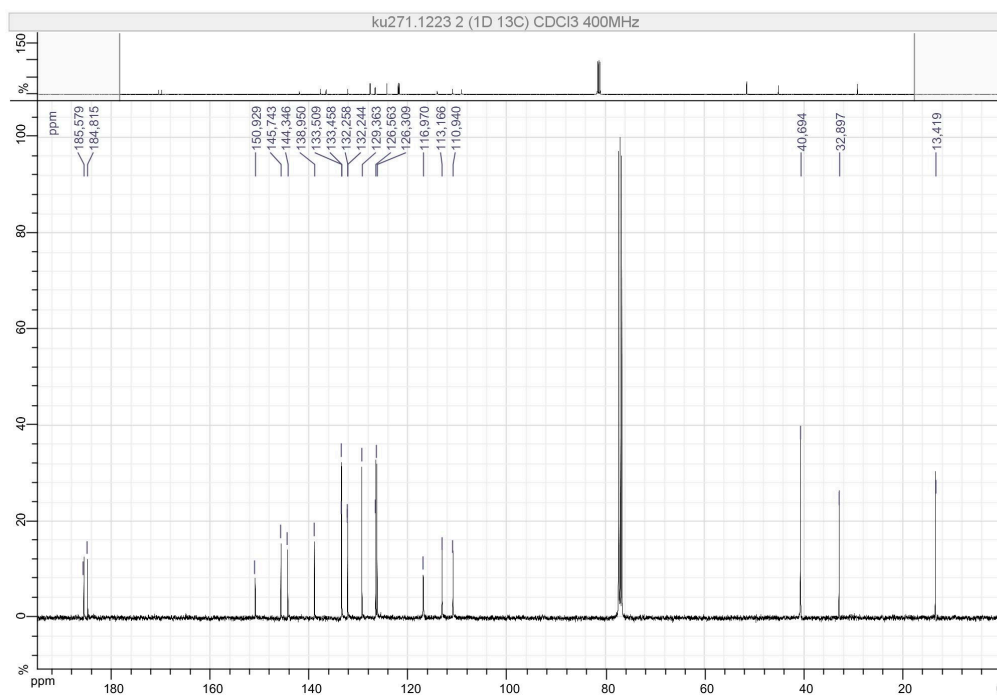

Figure S28. <sup>13</sup>C-NMR (100 MHz, CDCl<sub>3</sub>) spectrum of compound 18.



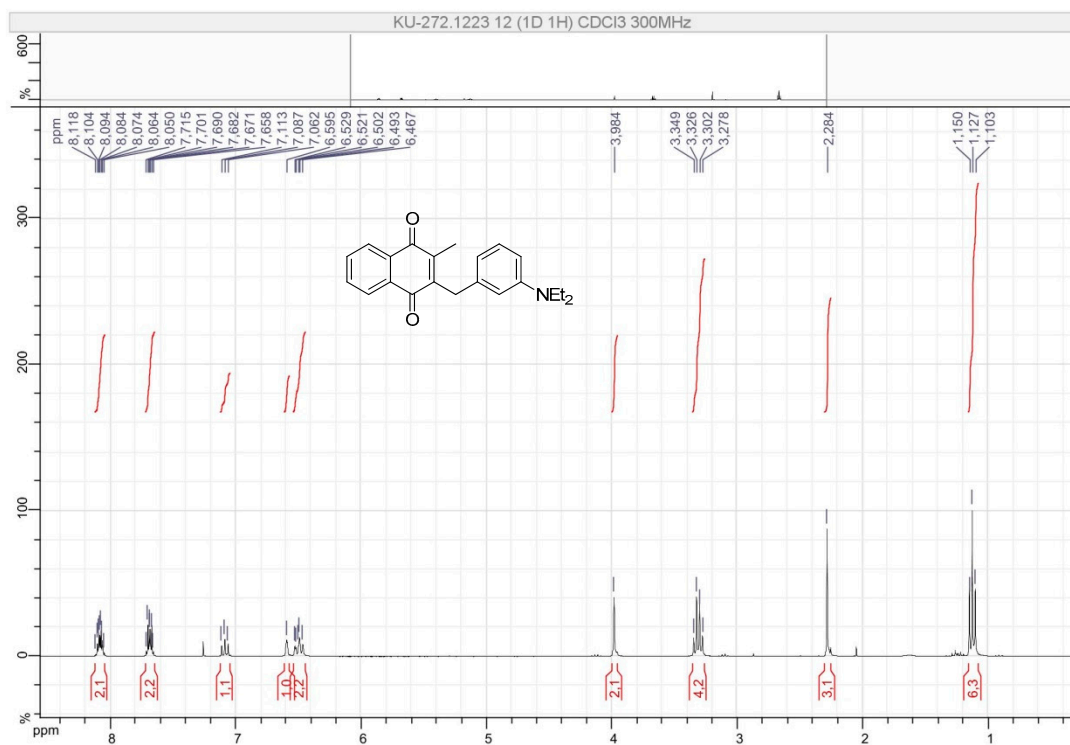

Figure S29. <sup>1</sup>H-NMR (300 MHz, CDCl<sub>3</sub>) spectrum of compound 19.

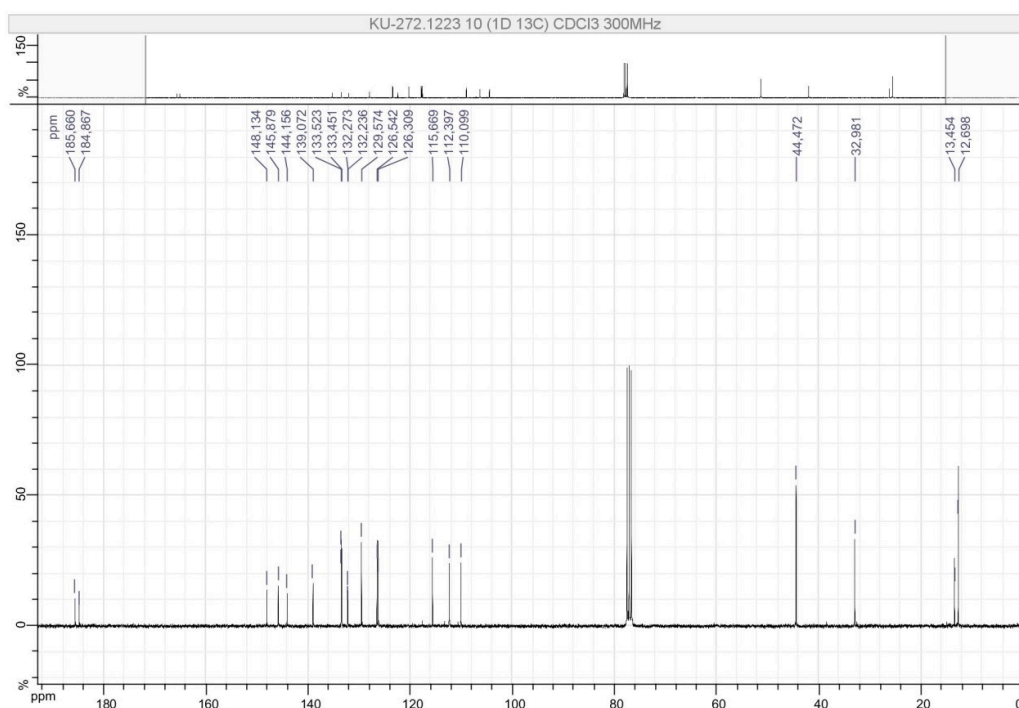

Figure S30. <sup>13</sup>C-NMR (75 MHz, CDCl<sub>3</sub>) spectrum of compound 19.

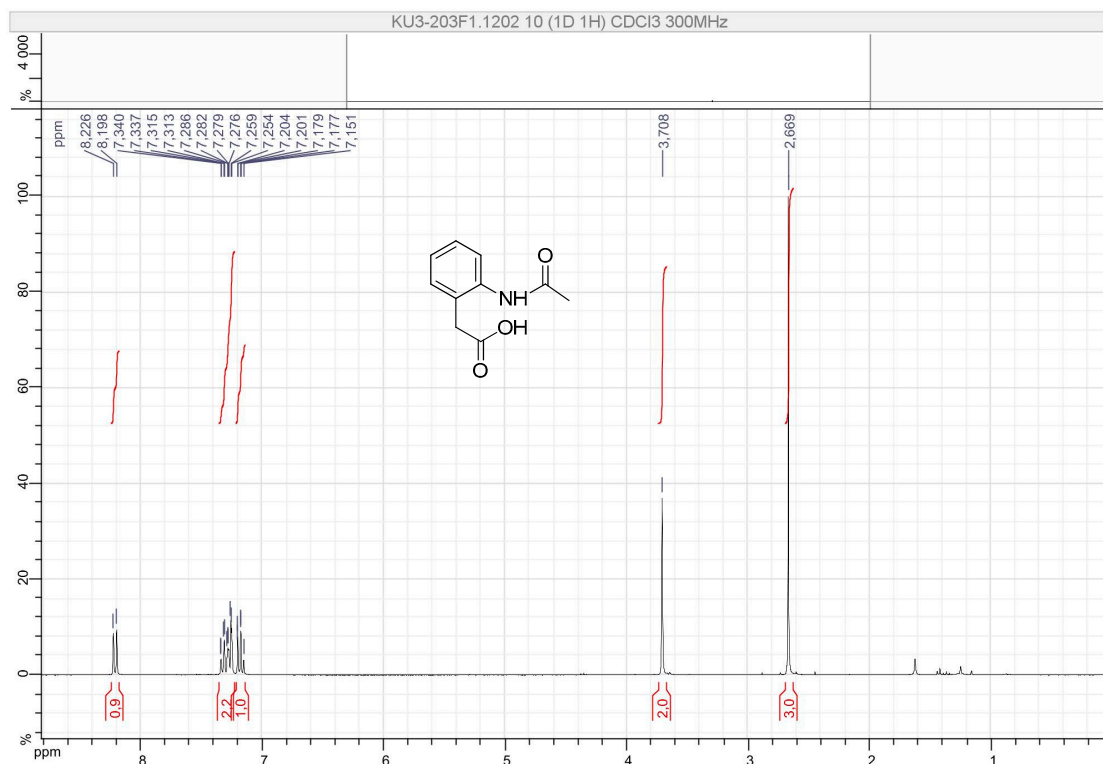

Figure S31. <sup>1</sup>H-NMR (300 MHz, CDCl<sub>3</sub>) spectrum of compound 21a.

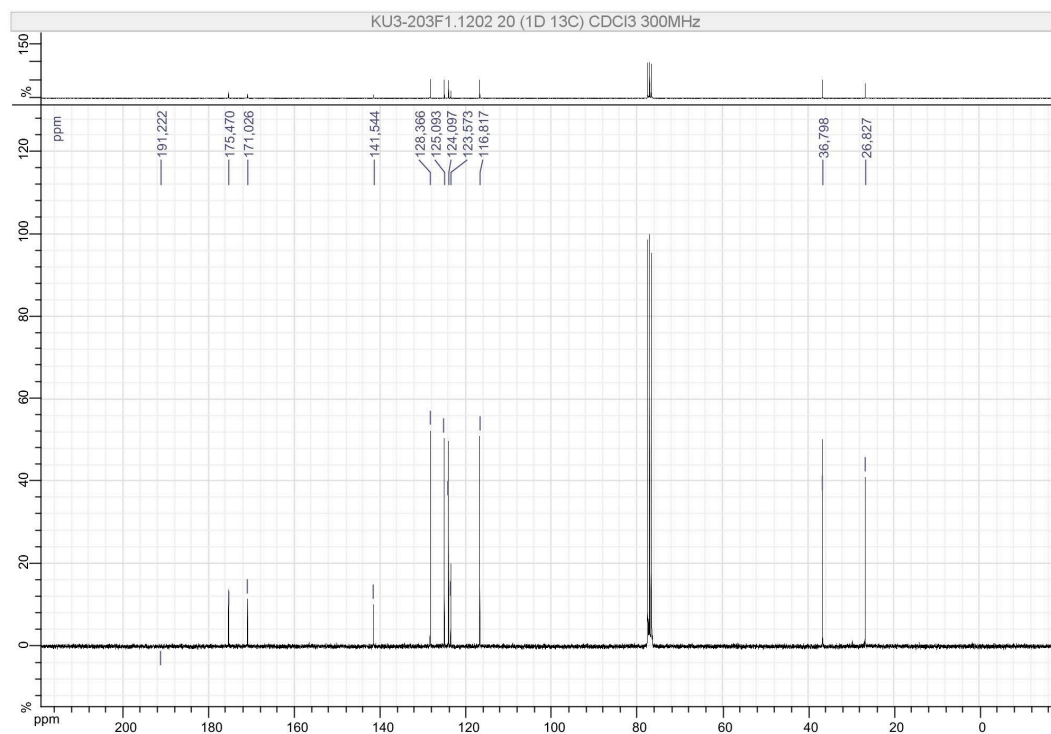

Figure S32. <sup>13</sup>C-NMR (75 MHz, CDCl<sub>3</sub>) spectrum of compound 21a.

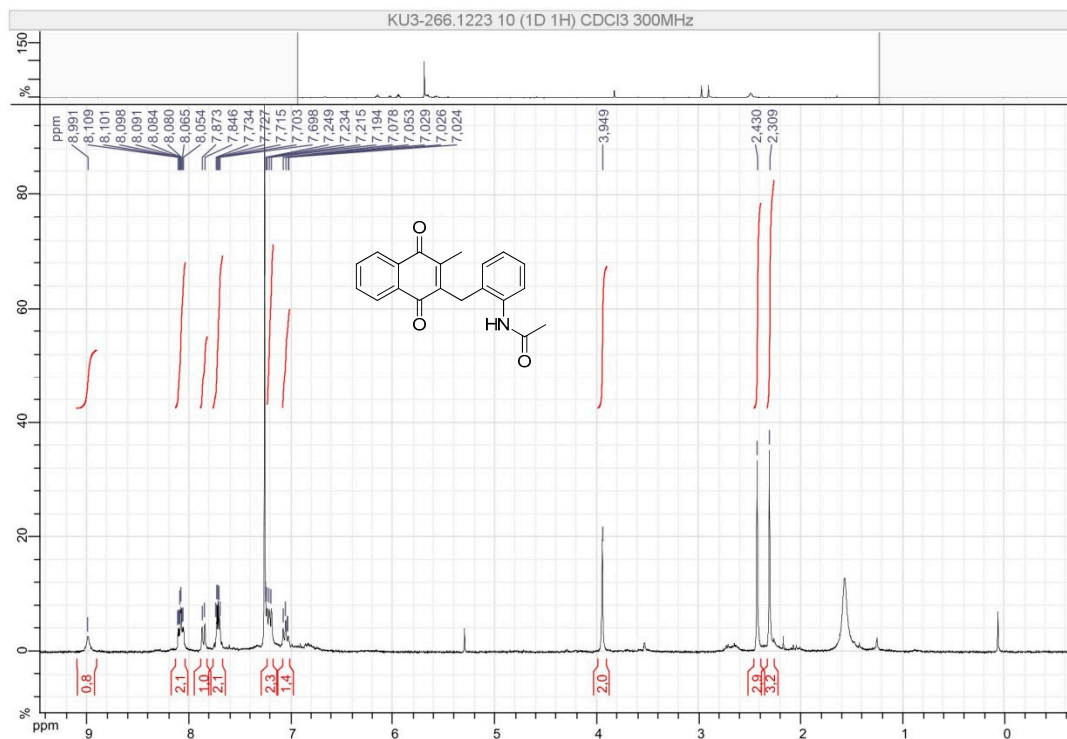

Figure S33. <sup>1</sup>H-NMR (300 MHz, CDCl<sub>3</sub>) spectrum of compound 22.

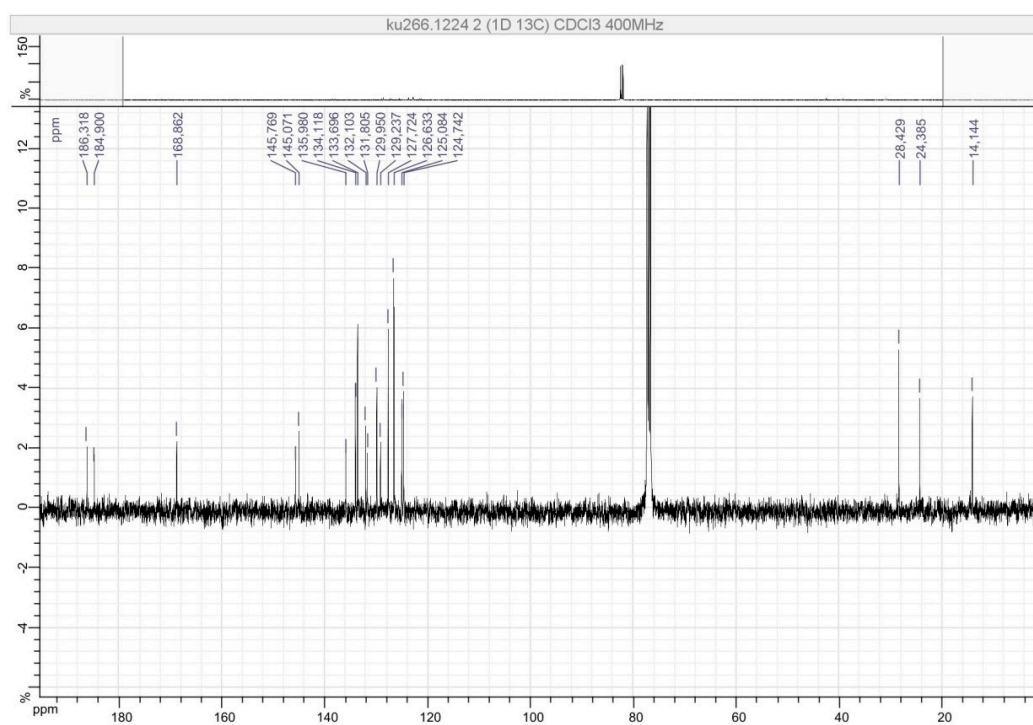

Figure S34. <sup>13</sup>C-NMR (100 MHz, CDCl<sub>3</sub>) spectrum of compound 22.

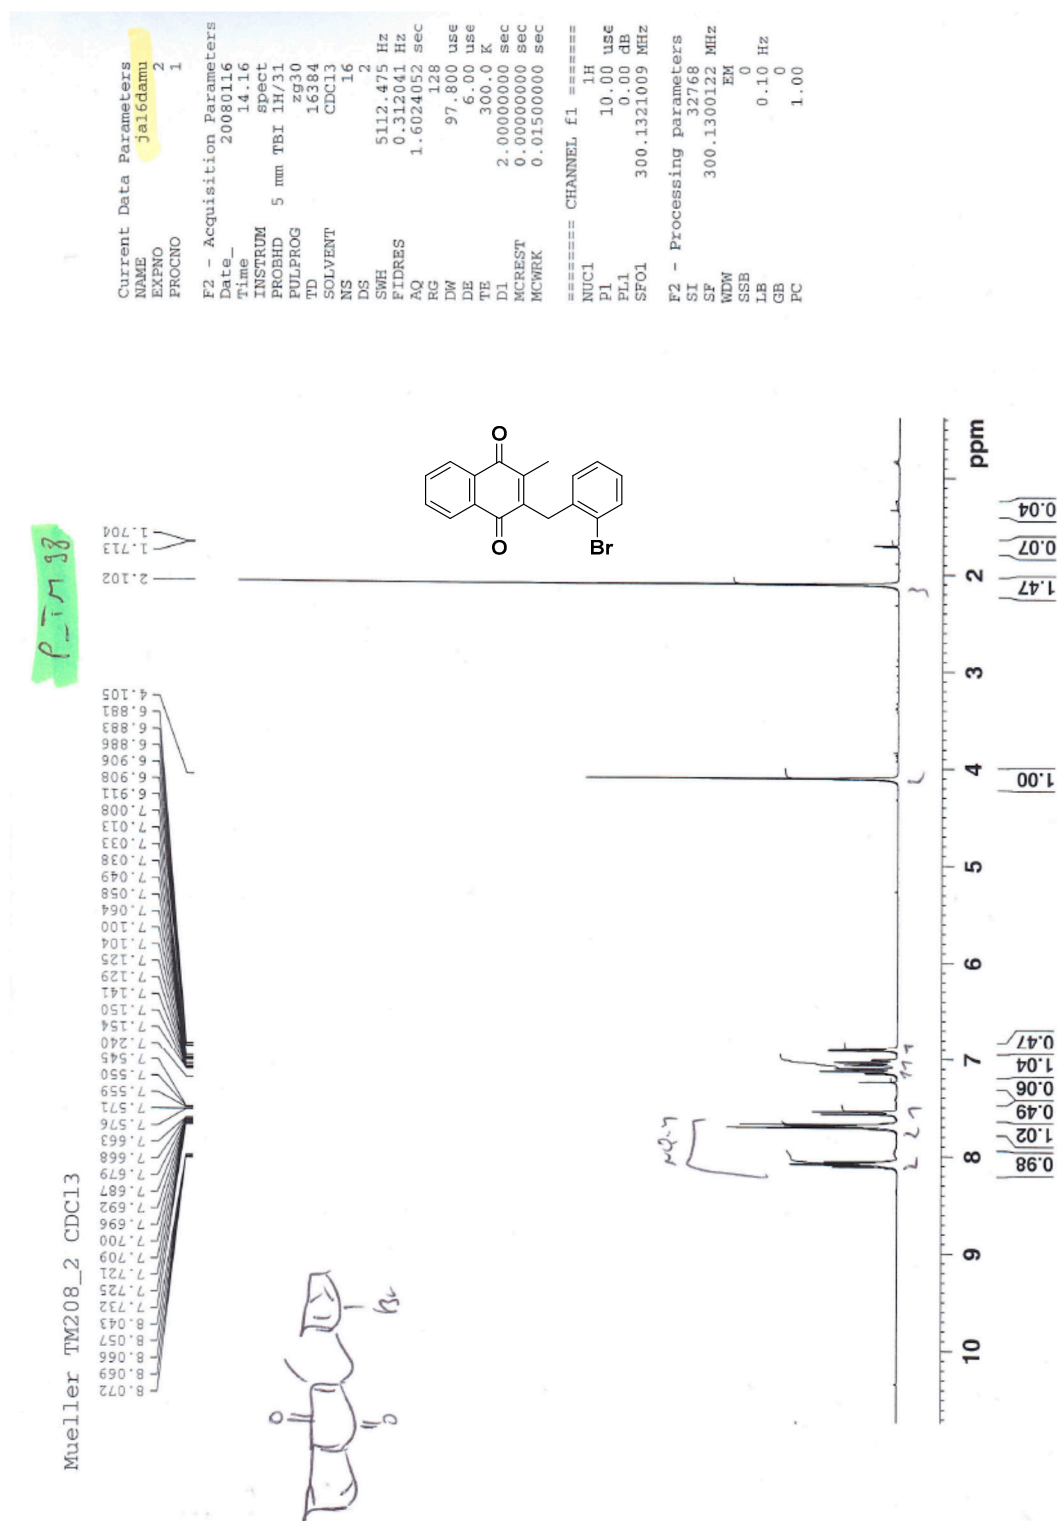Figure S35. <sup>1</sup>H-NMR (300 MHz, CDCl<sub>3</sub>) spectrum of compound 25a.



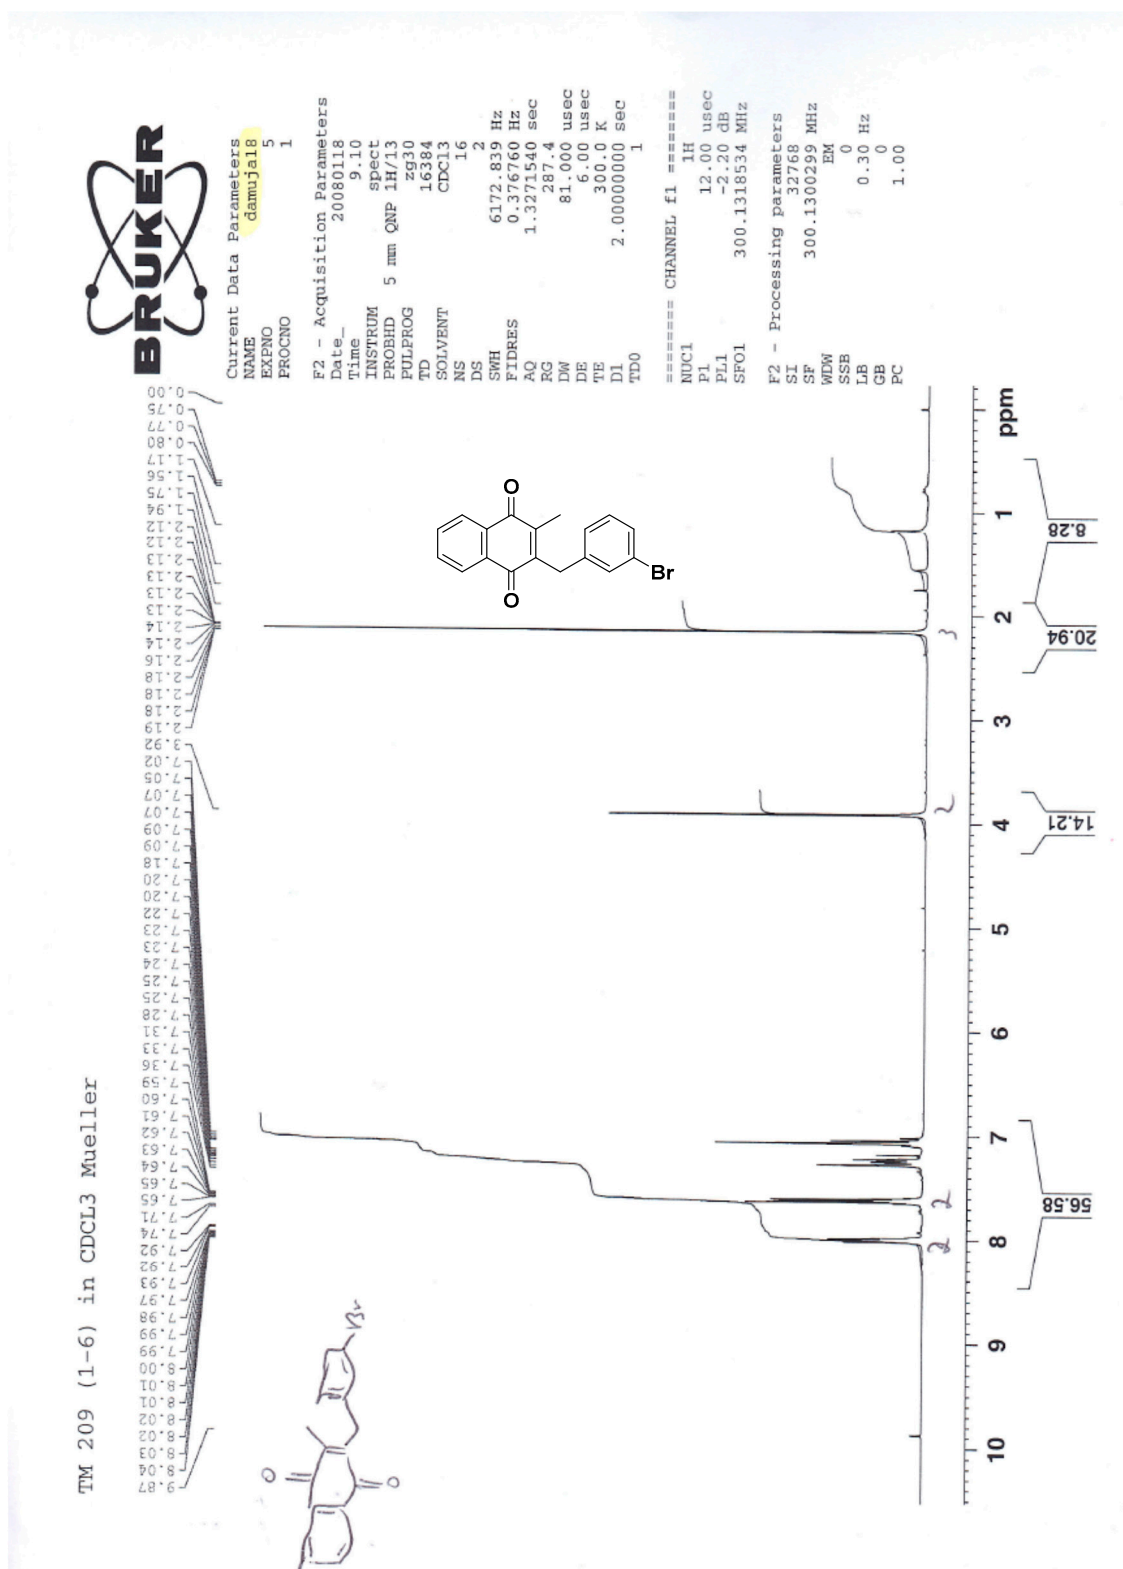Figure S37. <sup>1</sup>H-NMR (300 MHz, CDCl<sub>3</sub>) spectrum of compound 25b.

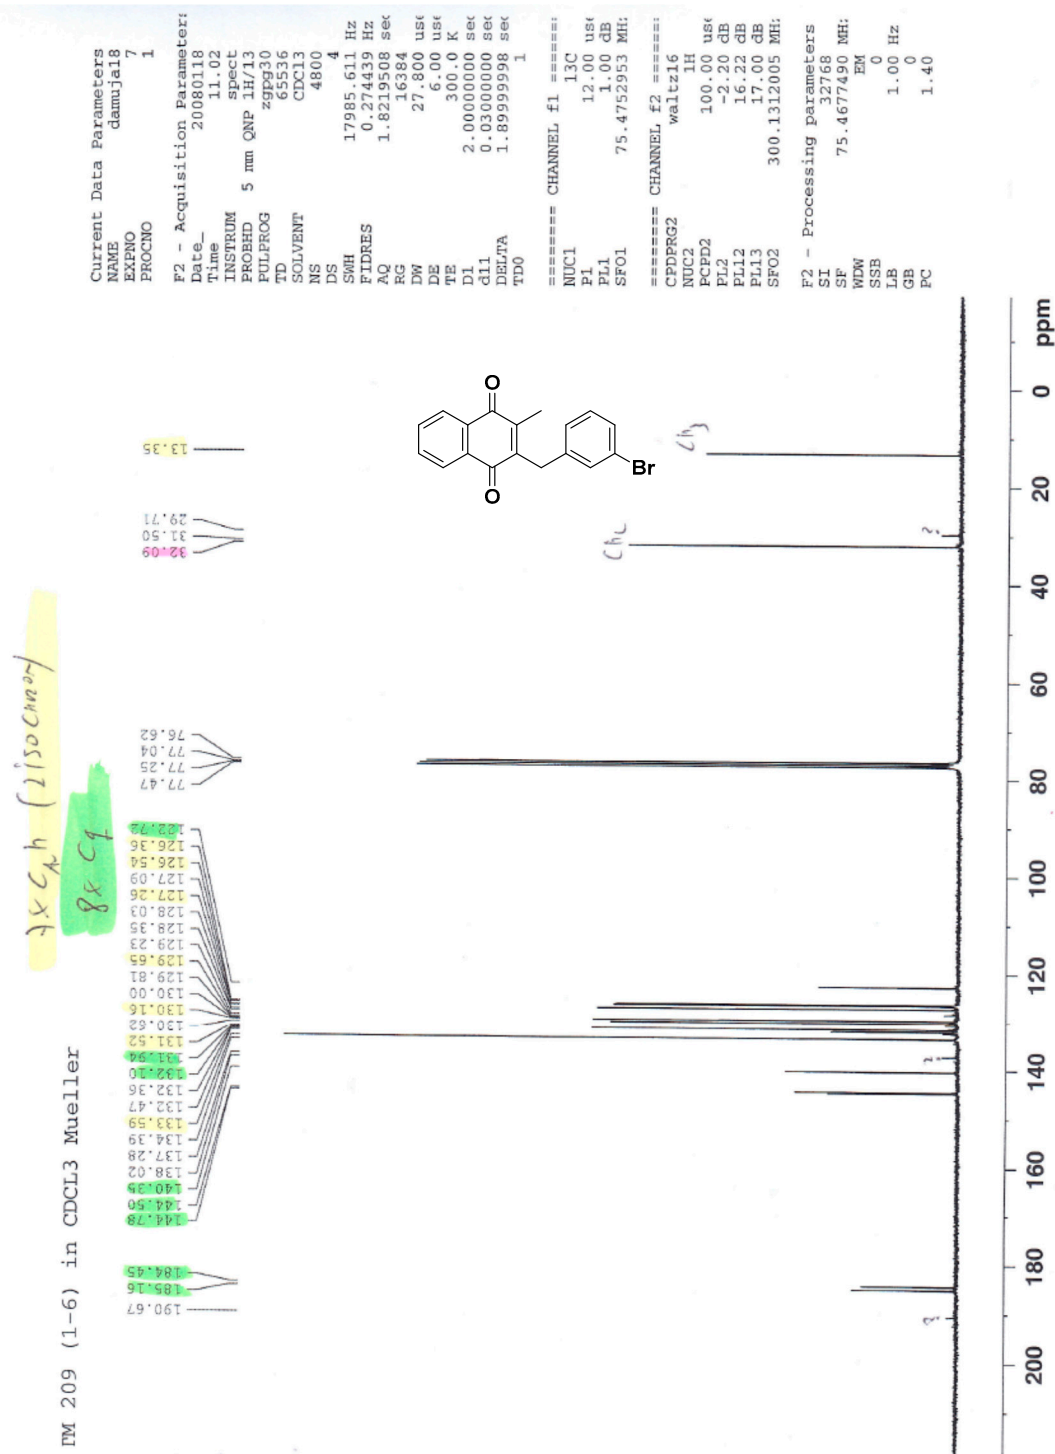

Figure S38. <sup>13</sup>C-NMR (75 MHz, CDCl<sub>3</sub>) spectrum of compound 25b.

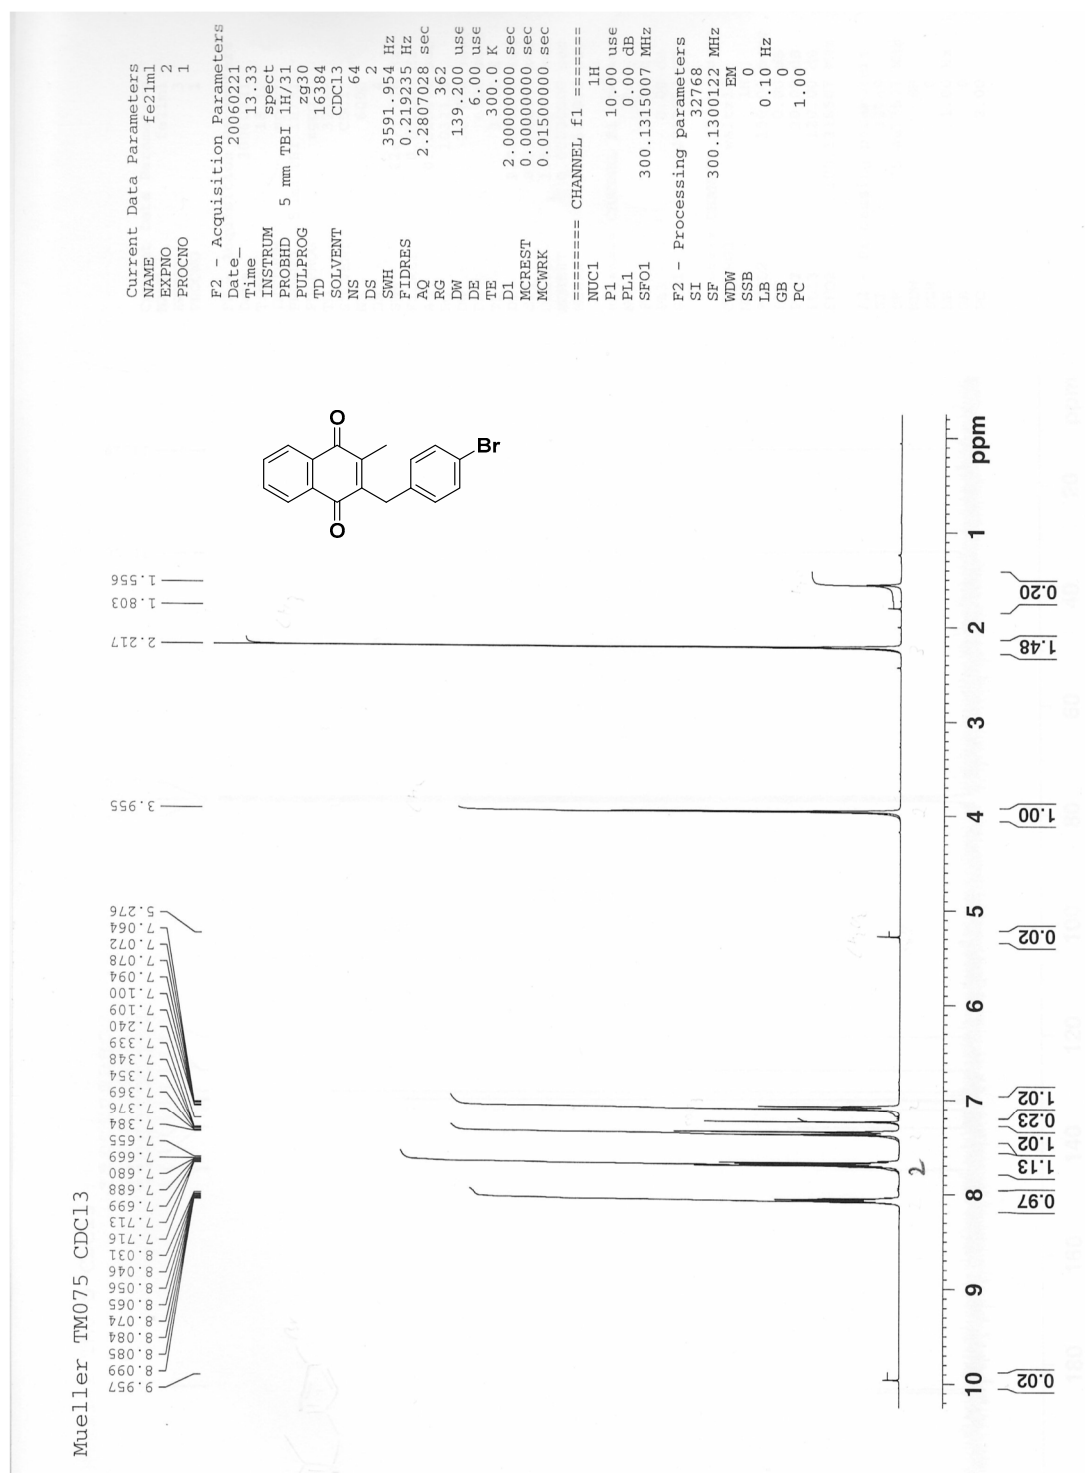Figure S39. <sup>1</sup>H-NMR (300 MHz, CDCl<sub>3</sub>) spectrum of compound 25c.



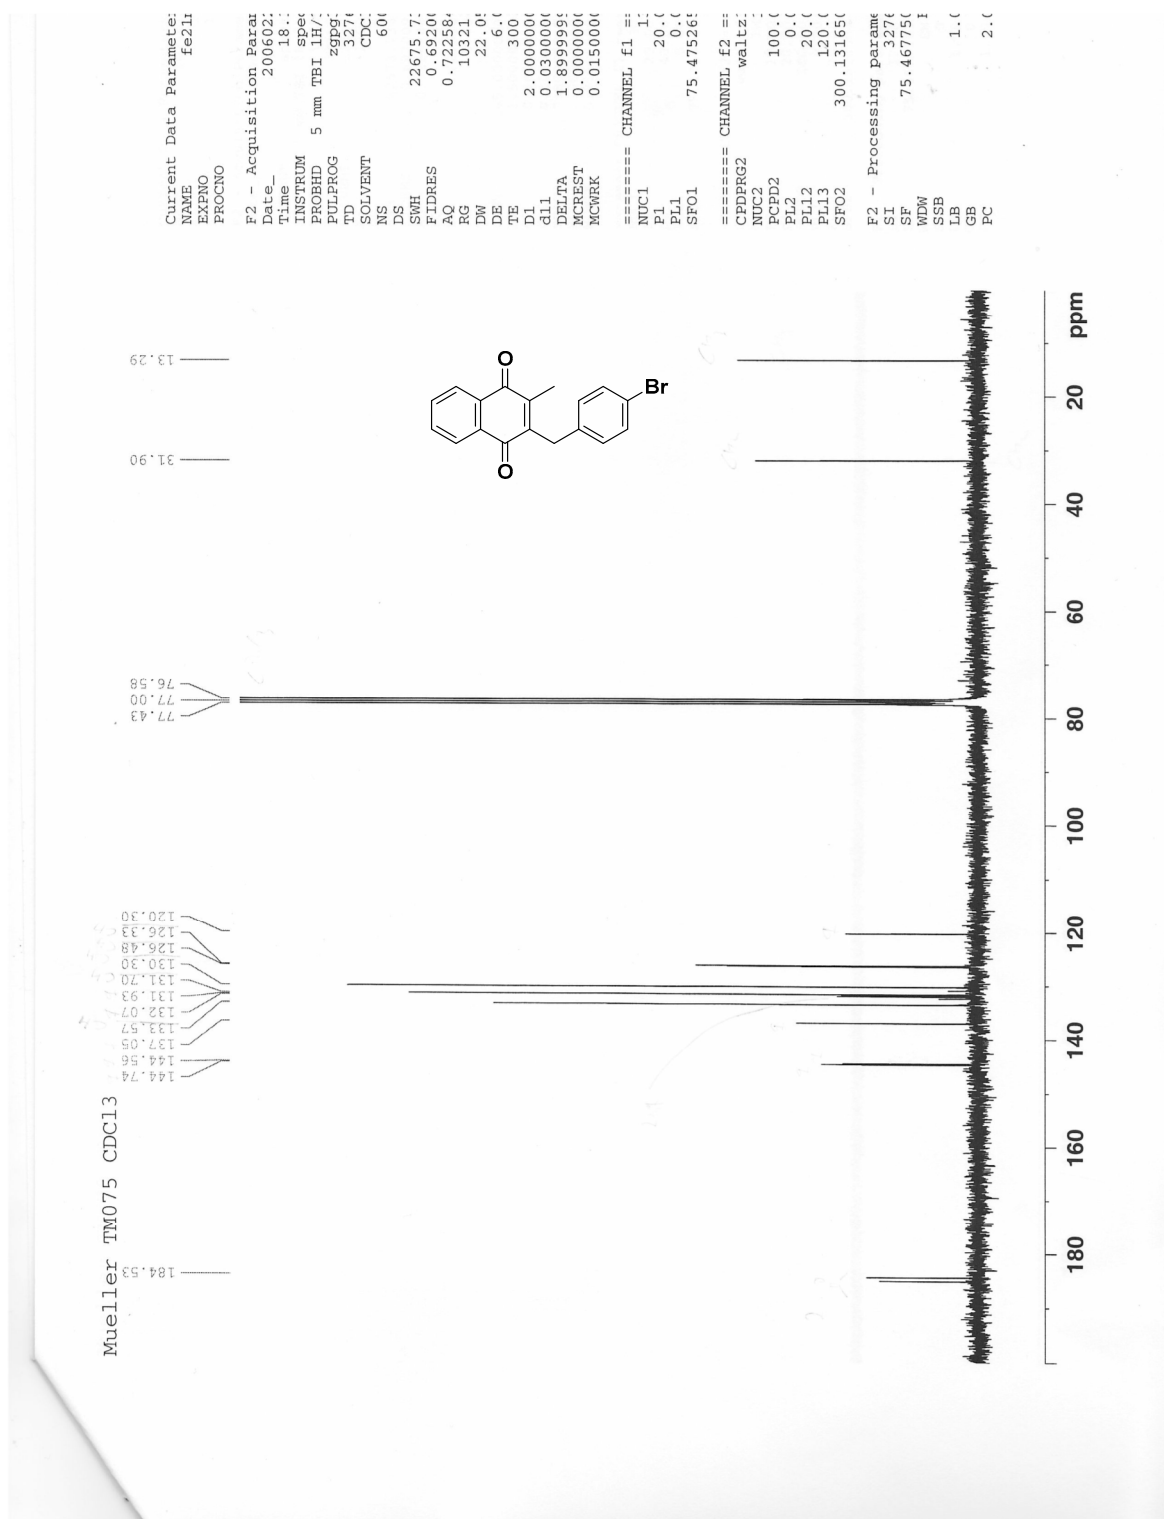Figure S40.  $^{13}\text{C}$ -NMR (75 MHz,  $\text{CDCl}_3$ ) spectrum of compound 25c.

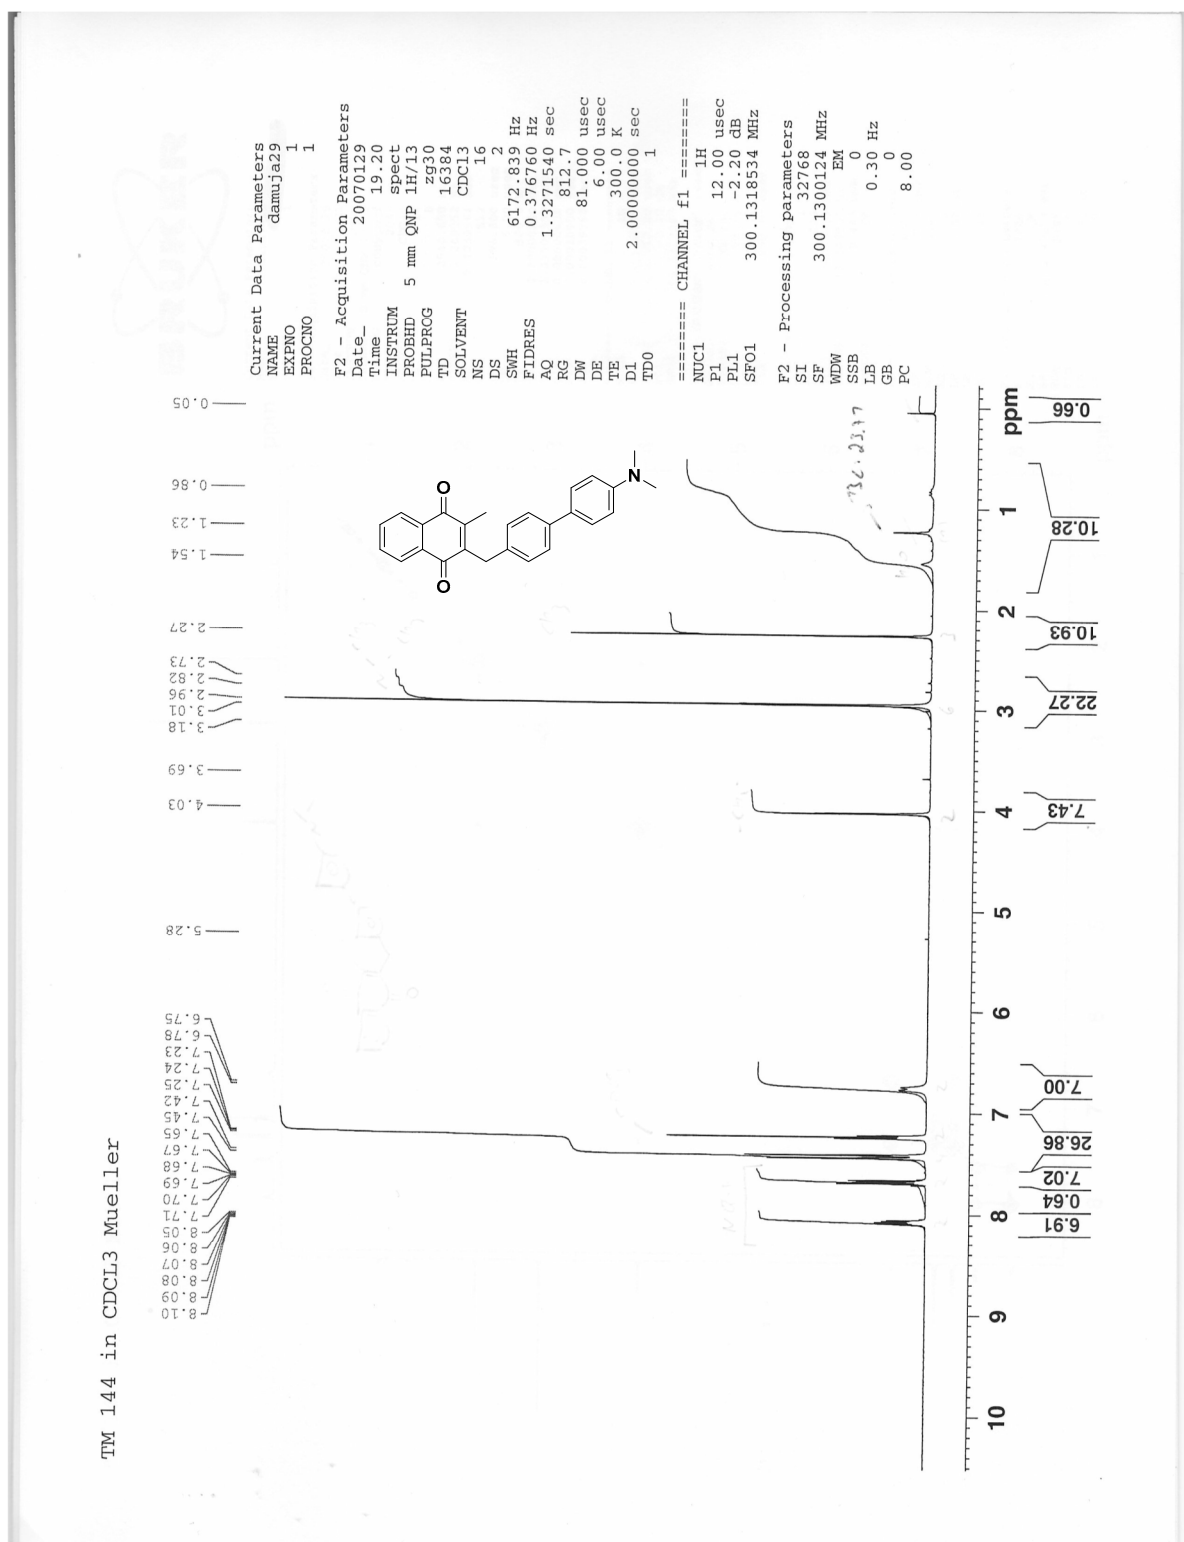Figure S41. <sup>1</sup>H-NMR (300 MHz, CDCl<sub>3</sub>) spectrum of compound 26.

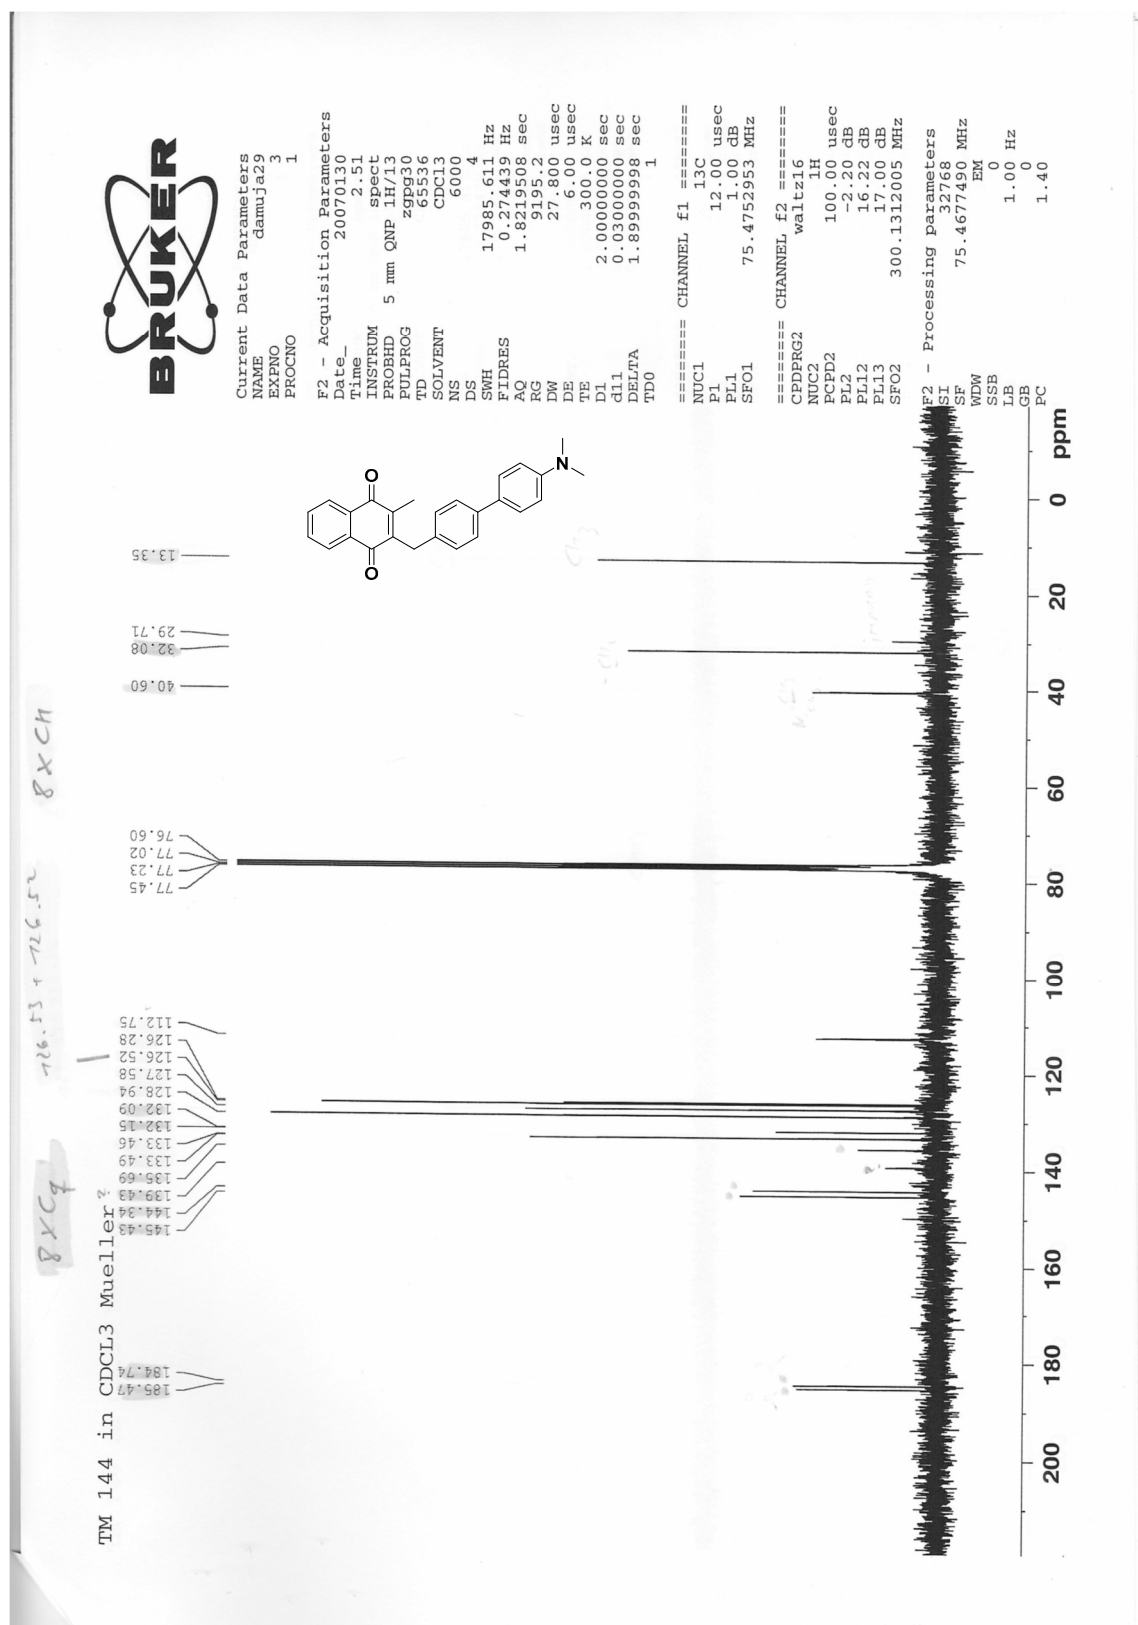Figure S42. <sup>13</sup>C-NMR (75 MHz, CDCl<sub>3</sub>) spectrum of compound 26.

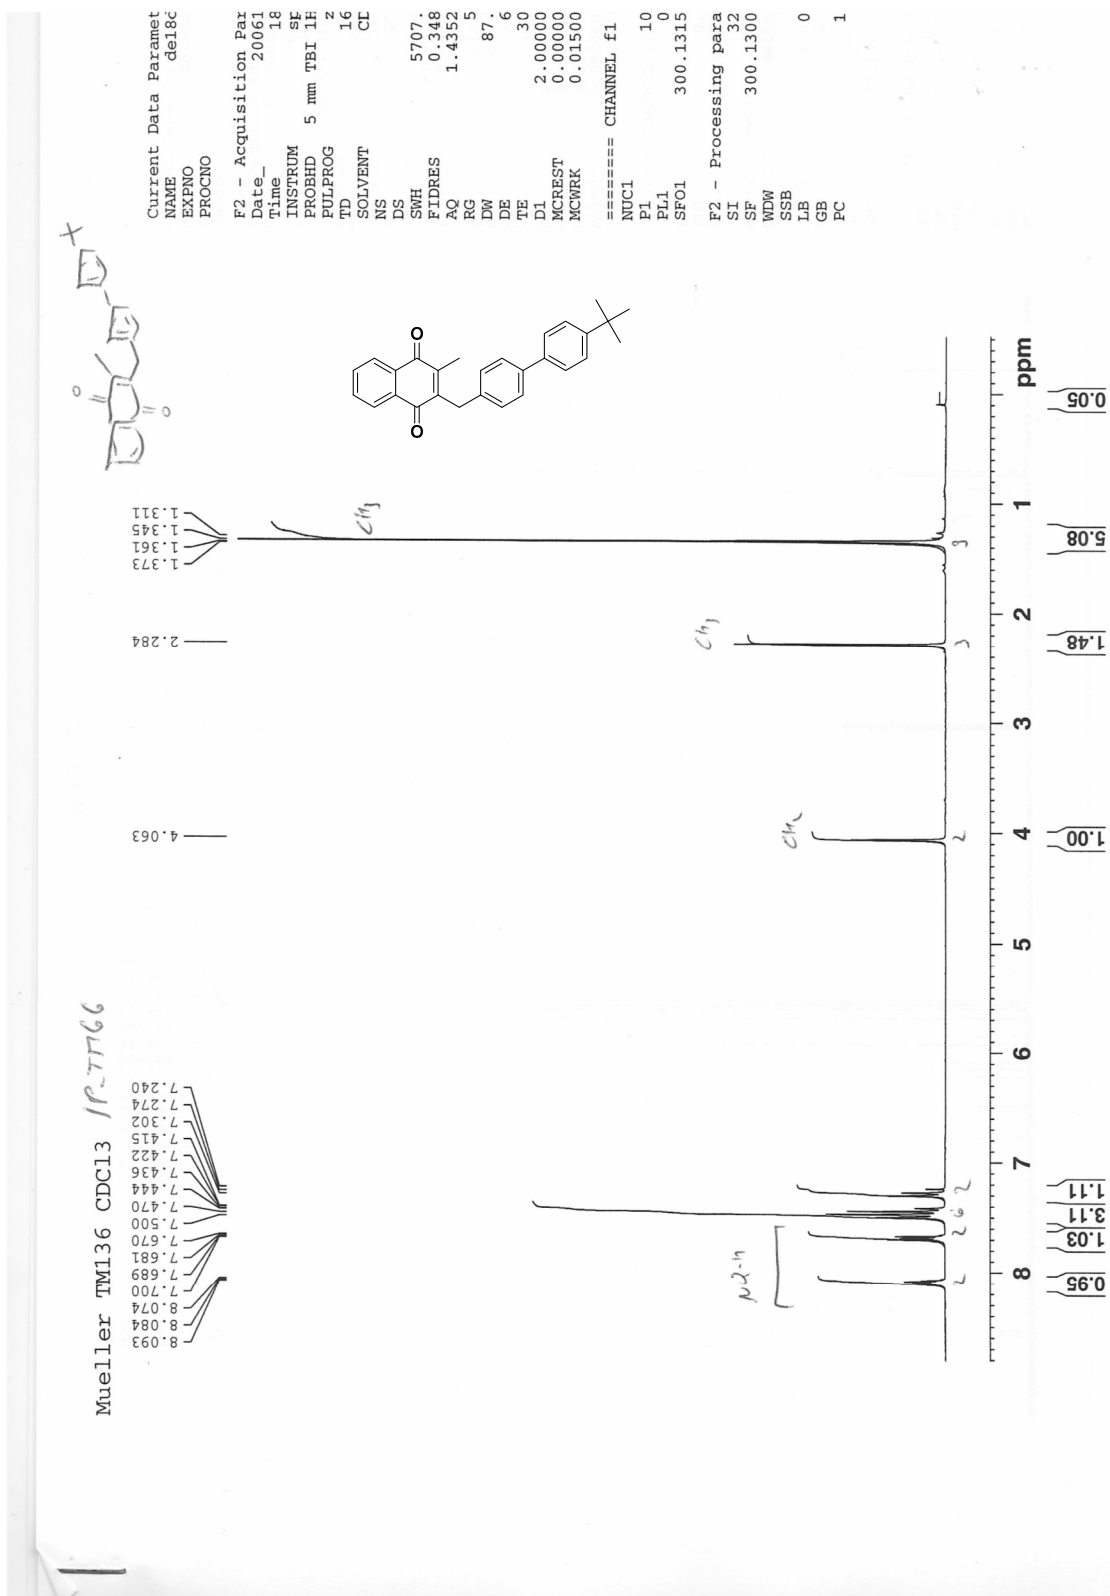

Figure S43. <sup>1</sup>H-NMR (300 MHz, CDCl<sub>3</sub>) spectrum of compound 27.

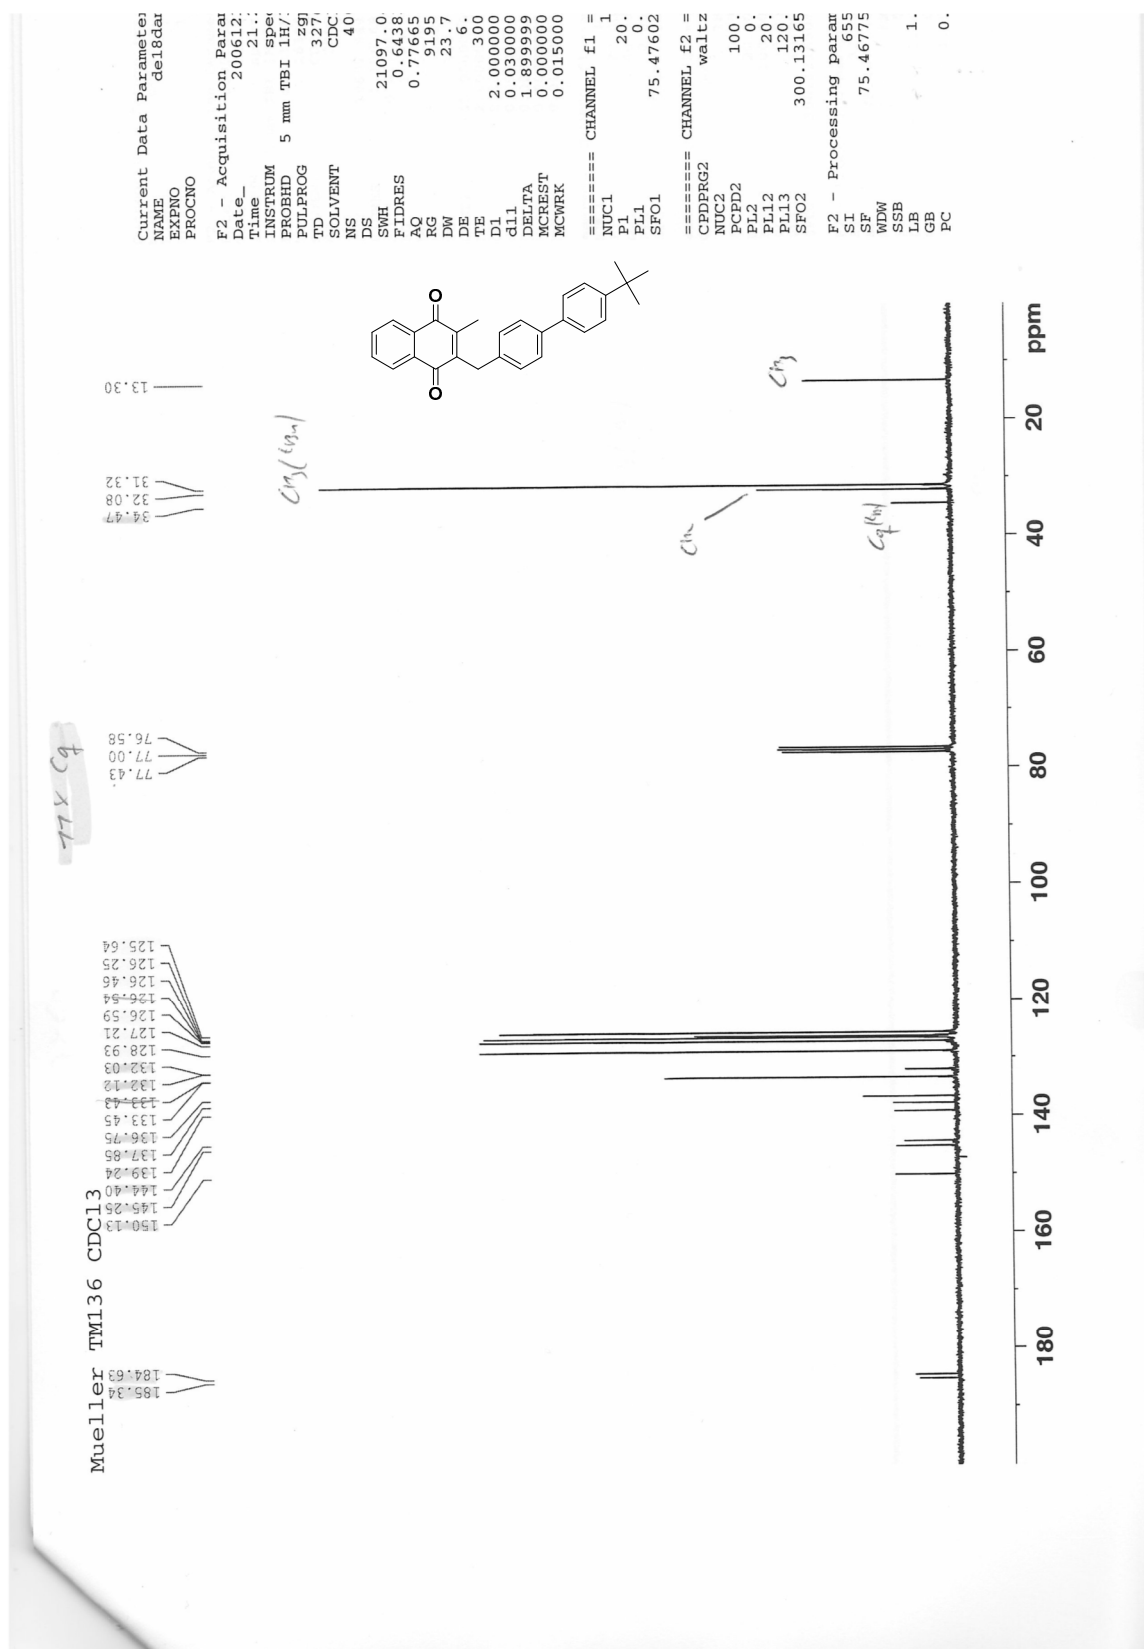Figure S44. <sup>13</sup>C-NMR (75 MHz, CDCl<sub>3</sub>) spectrum of compound 27.

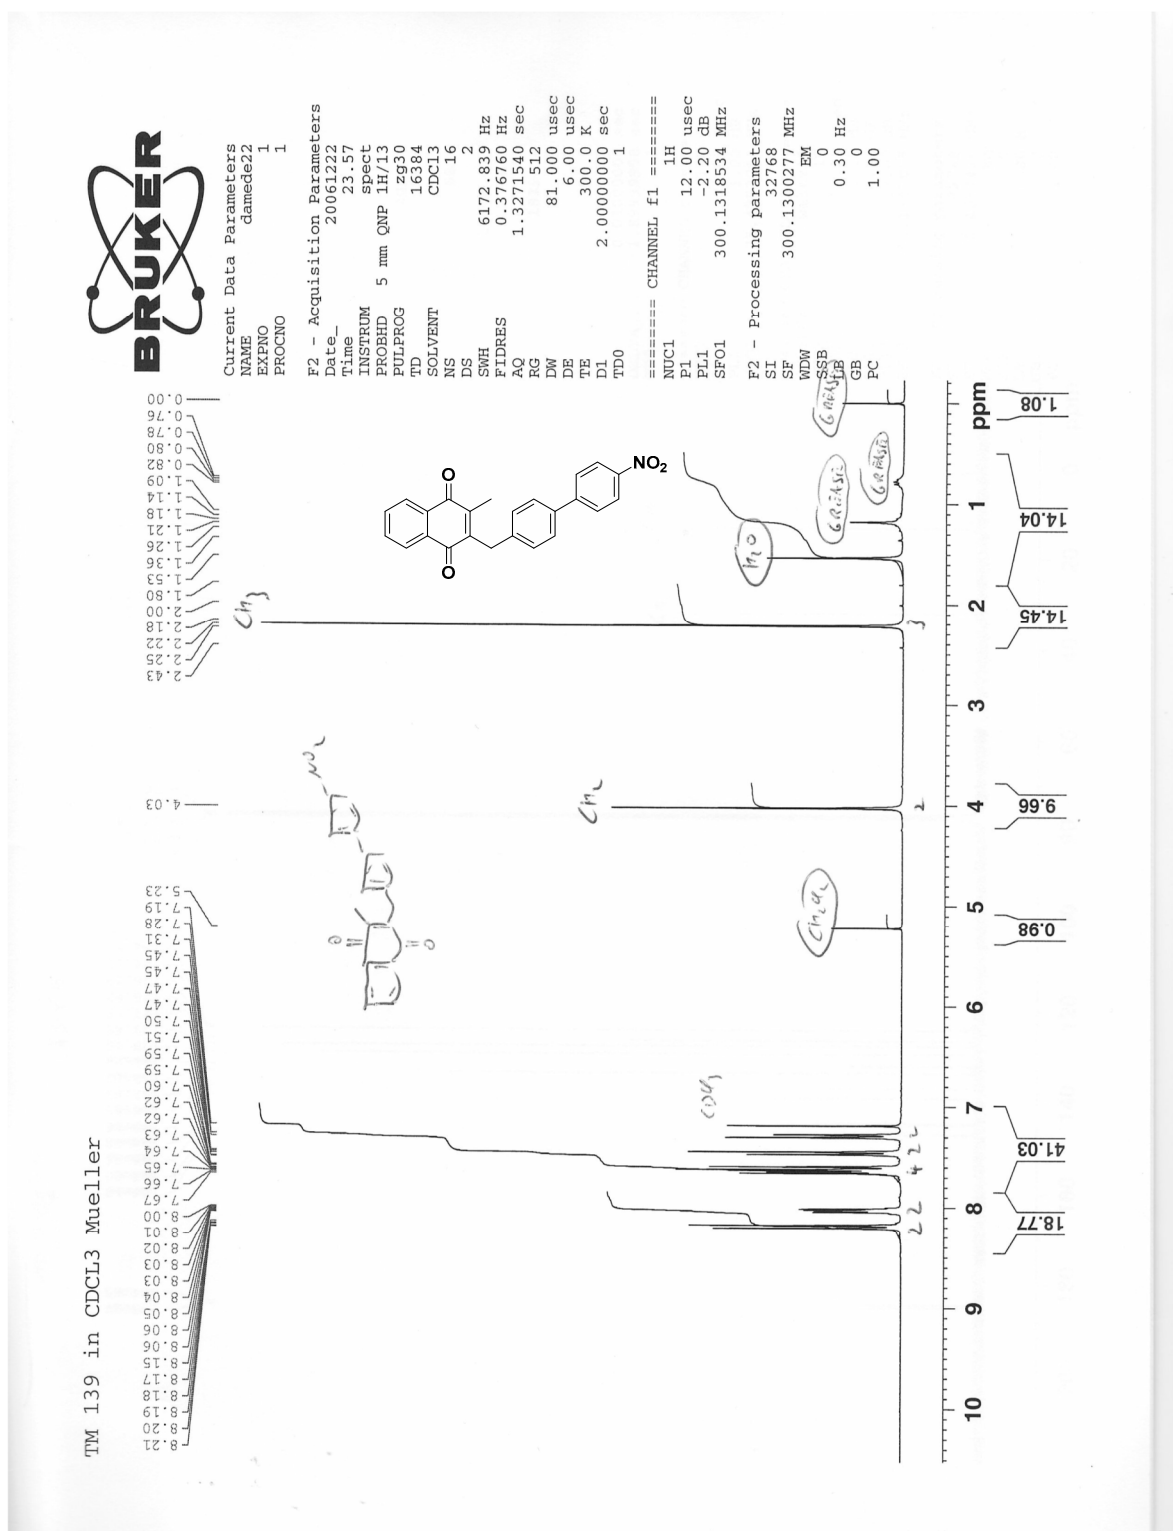Figure S45. <sup>1</sup>H-NMR (300 MHz, CDCl<sub>3</sub>) spectrum of compound 28.

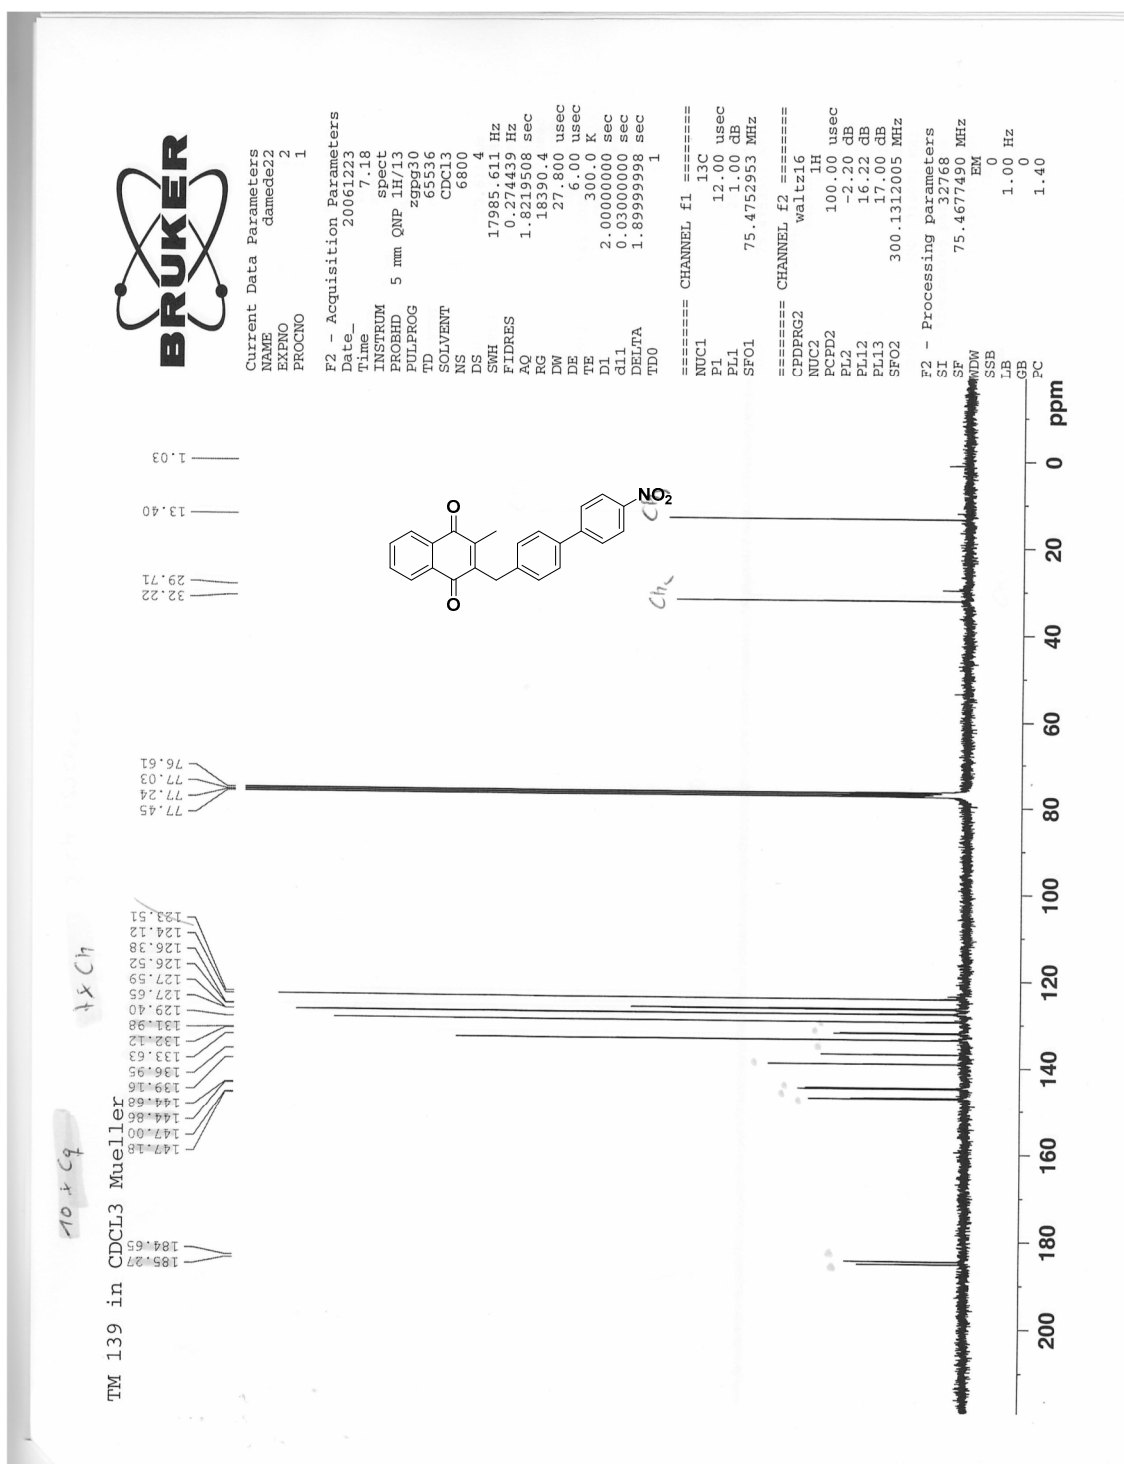Figure S46. <sup>13</sup>C-NMR (75 MHz, CDCl<sub>3</sub>) spectrum of compound 28.
